# Supplementary material
Source: PubMed Central journal article supplement (PMC6439648)

## Supplementary Online Content

Fang F, Zhang Y, Tang J, et al. Association of corticosteroid treatment with outcomes in adult patients with sepsis: a systematic review and meta-analysis. *JAMA Intern Med*. Published online December 21, 2018.  
doi:10.1001/jamainternmed.2018.5849

**eTable 1.** Definitions of outcomes

**eTable 2.** Search strategy

**eTable 3.** Inclusion criteria and exclusion criteria of including trials

**eTable 4.** Support for judgement for included trials rated as high risk of bias

**eTable 5.** Sensitivity analyses

**eFigure 1.** Risk of bias summary

**eFigure 2.** Risk of bias graph

**eFigure 3.** Trial sequential analysis for 28 days mortality

**eFigure 4.** Trial sequential analysis for 90 days mortality

**eFigure 5.** Funnel plot for 28 days mortality

**eFigure 6.** Subgroup analysis for 28 days mortality—based on dose of corticosteroid

**eFigure 7.** Subgroup analysis for 28 days mortality—based on treatment duration

**eFigure 8.** Subgroup analysis for 28 days mortality—based on sepsis population subtype

**eFigure 9.** Subgroup analysis for 28 days mortality—based on type of corticosteroids

**eFigure 10.** Subgroup analysis for 28 days mortality—based on control group mortality

**eFigure 11.** Meta-regression for 28-day mortality outcome by control group mortality

**eFigure 12.** Meta-regression for 28-day mortality outcome by year of study publication

**eFigure 13.** Forest plot for 90-day mortality

**eFigure 14.** Forest plot for ICU mortality

**eFigure 15.** Forest plot for hospital mortality

**eFigure 16.** Forest plot for length of stay in hospital

**eFigure 17.** Forest plot for length of stay in ICU

**eFigure 18.** Forest plot for shock reversal at day 7

**eFigure 19.** Forest plot for SOFA score at day 7

**eFigure 20.** Forest plot for time to resolution of shock

**eFigure 21.** Forest plot for vasopressor-free day to day 28

**eFigure 22.** Forest plot for ventilation-free day to day 28

**eFigure 23.** Forest plot for any severe adverse event

**eFigure 24.** Forest plot for gastroduodenal bleeding

**eFigure 25.** Forest plot for superinfections

**eFigure 26.** Forest plot for hyperglycemia

**eFigure 27.** Forest plot for hypernatremia

This supplementary material has been provided by the authors to give readers additional information about their work.

eTable 1: Definitions of outcomes

|                                    |                                                                                                                                                                                                                                                                                                              |
|------------------------------------|--------------------------------------------------------------------------------------------------------------------------------------------------------------------------------------------------------------------------------------------------------------------------------------------------------------|
| Day-28 mortality (Primary outcome) | Defined as the proportion of patients who had died by 28 days after randomization. We used hospital mortality or ICU mortality rates to compute the pooled analysis on 28-day mortality unless actual 28-day mortality rates could be extracted from the published trials or be obtained from study authors. |
| Day-90 mortality                   | The proportion of patients who had died by 90 days after randomization.                                                                                                                                                                                                                                      |
| Hospital mortality                 | The proportion of patients who had died in hospital after randomization.                                                                                                                                                                                                                                     |
| ICU mortality                      | The proportion of patients who had died in ICU after randomization.                                                                                                                                                                                                                                          |
| SOFA score at day 7                | The number of SOFA score at day 7                                                                                                                                                                                                                                                                            |
| Shock reversal at day 7            | The proportion of patients without hemodynamic instability requiring treatment with vasopressors or inotropes after resolution of the initial episode at day 7                                                                                                                                               |
| Time to shock reversal             | The time from randomization to the attainment of a clinician-prescribed mean arterial pressure target without the use of vasopressors or inotropes.                                                                                                                                                          |
| ICU length of stay                 | The total duration of stay in ICU                                                                                                                                                                                                                                                                            |
| Hospital length of stay            | The total duration of stay in hospital                                                                                                                                                                                                                                                                       |
| Health-related quality of life     | Defined in the included trials                                                                                                                                                                                                                                                                               |
| Vasopressor-free days to day 28    | The number of days that patients were alive and free of vasopressors at day 28                                                                                                                                                                                                                               |
| Ventilation-free days to day 28    | The number of days that patients were alive and free of mechanical ventilation at day 28                                                                                                                                                                                                                     |
| Any severe adverse event           | The proportion of patients experiencing at least one severe adverse event.                                                                                                                                                                                                                                   |
| Gastrointestinal bleeding          | Bleeding of the stomach or/and duodenum                                                                                                                                                                                                                                                                      |
| Superinfections                    | Reinfection or a second infection with a microbial agent                                                                                                                                                                                                                                                     |
| Hyperglycemia                      | The cut-off was defined in the included trials                                                                                                                                                                                                                                                               |
| Hypernatremia                      | The cut-off defined in the included trials                                                                                                                                                                                                                                                                   |

eTable 2: Search strategy

| <b>MEDLINE(R)</b> |                                                                                                                                                                                                                                                                                                                                                                                                                                                                                                                                                                                                                                                                                                                                                                                                                                                                               |         |
|-------------------|-------------------------------------------------------------------------------------------------------------------------------------------------------------------------------------------------------------------------------------------------------------------------------------------------------------------------------------------------------------------------------------------------------------------------------------------------------------------------------------------------------------------------------------------------------------------------------------------------------------------------------------------------------------------------------------------------------------------------------------------------------------------------------------------------------------------------------------------------------------------------------|---------|
| 1                 | exp Adrenal Cortex Hormones                                                                                                                                                                                                                                                                                                                                                                                                                                                                                                                                                                                                                                                                                                                                                                                                                                                   | 378296  |
| 2                 | exp STEROIDS                                                                                                                                                                                                                                                                                                                                                                                                                                                                                                                                                                                                                                                                                                                                                                                                                                                                  | 816471  |
| 3                 | (Adrenal Cortex Hormone* or adrenocortical hormone* or adrenocorticosteroid* or Corticosteroid* or Corticoid* or steroid* or glucocort* or cortisone* or hydrocortisone* or Cortisol or Epicortisol or Cortifair or Cortril or hydroxyhydrocortisone or oxohydrocortisone or tetrahydrocortisol or dexamethason* or baycuten or dextatopic or sofradex or Methylfluorpreordnisolone or Hexadecadrol or Decameth or Decaspray or Dexasone or Dexpak or Maxidex or Millicorten or Oradexon or Decaject or Decaject or Hexadrol or methylprednisolon* or (methyl adj3 prednisolone) or Metipred or Urbason or Medrol or Betamethasone or Flubenisolone or Betadexamethasone or Celestona or Cellestoderm or Celeston or Celestone or prednison* or prednisolon* or hydroxyprednisolone or desonide or Predate or Predonine or Di-Adreson-F or DiAdresonF or triamcinolon*).mp. ( | 672625  |
| 4                 | exp SEPSIS                                                                                                                                                                                                                                                                                                                                                                                                                                                                                                                                                                                                                                                                                                                                                                                                                                                                    | 112301  |
| 5                 | (Sepsis or septic or Sepses or Py?emia? or Septic?emia? or (blood adj2 poison*) or Bacter?emia? or bacill?emia? or (Lemierre* adj2 (syndrome or disease)) or necrobacillosis or meningococc?emia? or Endotoxemia? or Fung?emia? or Candid?emia? or ((Toxic or Endotox* or bacter*) adj2 Shock) or toxic forward failure or Parasitemia? or Viremia? or urosepsis).mp.                                                                                                                                                                                                                                                                                                                                                                                                                                                                                                         | 224779  |
| 6                 | (1 or 2 or 3) and (4 or 5)                                                                                                                                                                                                                                                                                                                                                                                                                                                                                                                                                                                                                                                                                                                                                                                                                                                    | 11388   |
| 7                 | randomized controlled trial.pt.                                                                                                                                                                                                                                                                                                                                                                                                                                                                                                                                                                                                                                                                                                                                                                                                                                               | 466885  |
| 8                 | controlled clinical trial.pt.                                                                                                                                                                                                                                                                                                                                                                                                                                                                                                                                                                                                                                                                                                                                                                                                                                                 | 92588   |
| 9                 | randomized.ab.                                                                                                                                                                                                                                                                                                                                                                                                                                                                                                                                                                                                                                                                                                                                                                                                                                                                | 419464  |
| 10                | placebo.ab                                                                                                                                                                                                                                                                                                                                                                                                                                                                                                                                                                                                                                                                                                                                                                                                                                                                    | 191110  |
| 11                | drug therapy.fs.                                                                                                                                                                                                                                                                                                                                                                                                                                                                                                                                                                                                                                                                                                                                                                                                                                                              | 2040402 |
| 12                | randomly.ab.                                                                                                                                                                                                                                                                                                                                                                                                                                                                                                                                                                                                                                                                                                                                                                                                                                                                  | 295667  |
| 13                | trial.ab.                                                                                                                                                                                                                                                                                                                                                                                                                                                                                                                                                                                                                                                                                                                                                                                                                                                                     | 436805  |
| 14                | groups.ab.                                                                                                                                                                                                                                                                                                                                                                                                                                                                                                                                                                                                                                                                                                                                                                                                                                                                    | 1824888 |
| 15                | 7 or 8 or 9 or 10 or 11 or 12 or 13 or 14                                                                                                                                                                                                                                                                                                                                                                                                                                                                                                                                                                                                                                                                                                                                                                                                                                     | 4263445 |
| 16                | exp animals/ not humans.sh                                                                                                                                                                                                                                                                                                                                                                                                                                                                                                                                                                                                                                                                                                                                                                                                                                                    | 4487377 |
| 17                | 15 not 16                                                                                                                                                                                                                                                                                                                                                                                                                                                                                                                                                                                                                                                                                                                                                                                                                                                                     | 3685711 |
| 18                | 6 and 17                                                                                                                                                                                                                                                                                                                                                                                                                                                                                                                                                                                                                                                                                                                                                                                                                                                                      | 4515    |
| <b>Embase</b>     |                                                                                                                                                                                                                                                                                                                                                                                                                                                                                                                                                                                                                                                                                                                                                                                                                                                                               |         |
| 1                 | exp corticosteroid/                                                                                                                                                                                                                                                                                                                                                                                                                                                                                                                                                                                                                                                                                                                                                                                                                                                           | 800954  |
| 2                 | (Adrenal Cortex Hormone* or adrenocortical hormone* or adrenocorticosteroid* or Corticosteroid* or Corticoid* or steroid* or glucocort* or cortisone* or hydrocortisone* or Cortisol or Epicortisol or Cortifair or Cortril or hydroxyhydrocortisone or oxohydrocortisone or tetrahydrocortisol or dexamethason* or baycuten or dextatopic or sofradex or Methylfluorpreordnisolone or Hexadecadrol or Decameth or Decaspray or Dexasone or Dexpak or Maxidex or Millicorten or Oradexon or Decaject or Decaject or Hexadrol or methylprednisolon* or (methyl adj3 prednisolone) or Metipred or Urbason or Medrol or Betamethasone or Flubenisolone or Betadexamethasone or Celestona or Cellestoderm or Celeston or Celestone or prednison* or prednisolon* or hydroxyprednisolone or desonide or Predate or Predonine or Di-Adreson-F or DiAdresonF or triamcinolon*).mp.   | 1054830 |

|                                                                     |                                                                                                                                                                                                                                                                                                                                                                                                                                                                                                                                                                                                                                                                                                                                                                                                                                                                            |          |
|---------------------------------------------------------------------|----------------------------------------------------------------------------------------------------------------------------------------------------------------------------------------------------------------------------------------------------------------------------------------------------------------------------------------------------------------------------------------------------------------------------------------------------------------------------------------------------------------------------------------------------------------------------------------------------------------------------------------------------------------------------------------------------------------------------------------------------------------------------------------------------------------------------------------------------------------------------|----------|
| 3                                                                   | exp SEPSIS/                                                                                                                                                                                                                                                                                                                                                                                                                                                                                                                                                                                                                                                                                                                                                                                                                                                                | 216562   |
| 4                                                                   | (Sepsis or septic or Sepses or Py?emia? or Septic?emia? or (blood adj2 poison*) or Bacter?emia? or bacill?emia? or (Lemierre* adj2 (syndrome or disease)) or necrobacillosis or meningococc?emia? or Endotoxemia? or Fung?emia? or Candid?emia? or ((Toxic or Endotox* or bacter*) adj2 Shock) or toxic forward failure or Parasitemia? or Viremia? or urosepsis).mp.                                                                                                                                                                                                                                                                                                                                                                                                                                                                                                      | 330765   |
| 5                                                                   | (1 or 2) and (3 or 4)                                                                                                                                                                                                                                                                                                                                                                                                                                                                                                                                                                                                                                                                                                                                                                                                                                                      | 485121   |
| 6                                                                   | randomized controlled trial/                                                                                                                                                                                                                                                                                                                                                                                                                                                                                                                                                                                                                                                                                                                                                                                                                                               | 53693    |
| 7                                                                   | crossover procedure/                                                                                                                                                                                                                                                                                                                                                                                                                                                                                                                                                                                                                                                                                                                                                                                                                                                       | 53693    |
| 8                                                                   | double blind procedure/                                                                                                                                                                                                                                                                                                                                                                                                                                                                                                                                                                                                                                                                                                                                                                                                                                                    | 144960   |
| 9                                                                   | single blind procedure/                                                                                                                                                                                                                                                                                                                                                                                                                                                                                                                                                                                                                                                                                                                                                                                                                                                    | 30217    |
| 10                                                                  | (random* or factorial* or crossover* or placebo* or assign* or allocat* or volunteer* or (doubl* adj5 blind*) or (singl* adj5 blind*)).mp.                                                                                                                                                                                                                                                                                                                                                                                                                                                                                                                                                                                                                                                                                                                                 | 2160682  |
| 11                                                                  | 6 or 7 or 8 or 9 or 10                                                                                                                                                                                                                                                                                                                                                                                                                                                                                                                                                                                                                                                                                                                                                                                                                                                     | 2160682  |
| 12                                                                  | exp animal                                                                                                                                                                                                                                                                                                                                                                                                                                                                                                                                                                                                                                                                                                                                                                                                                                                                 | 22103819 |
| 13                                                                  | human                                                                                                                                                                                                                                                                                                                                                                                                                                                                                                                                                                                                                                                                                                                                                                                                                                                                      | 17796064 |
| 14                                                                  | 12 not 13                                                                                                                                                                                                                                                                                                                                                                                                                                                                                                                                                                                                                                                                                                                                                                                                                                                                  | 4307755  |
| 15                                                                  | 11 not 14                                                                                                                                                                                                                                                                                                                                                                                                                                                                                                                                                                                                                                                                                                                                                                                                                                                                  | 1950985  |
| 16                                                                  | 5 and 15                                                                                                                                                                                                                                                                                                                                                                                                                                                                                                                                                                                                                                                                                                                                                                                                                                                                   | 3716     |
| <b>EBM Reviews - Cochrane Central Register of Controlled Trials</b> |                                                                                                                                                                                                                                                                                                                                                                                                                                                                                                                                                                                                                                                                                                                                                                                                                                                                            |          |
| 1                                                                   | exp Adrenal Cortex Hormones/                                                                                                                                                                                                                                                                                                                                                                                                                                                                                                                                                                                                                                                                                                                                                                                                                                               | 24875    |
| 2                                                                   | exp STEROIDS/                                                                                                                                                                                                                                                                                                                                                                                                                                                                                                                                                                                                                                                                                                                                                                                                                                                              | 48557    |
| 3                                                                   | (Adrenal Cortex Hormone* or adrenocortical hormone* or adrenocorticosteroid* or Corticosteroid* or Corticoid* or steroid* or glucocort* or cortisone* or hydrocortisone* or Cortisol or Epicortisol or Cortifair or Cortril or hydroxyhydrocortisone or oxohydrocortisone or tetrahydrocortisol or dexamethason* or baycuten or dexatopic or sofradex or Methylfluorpreordnisolone or Hexadecadrol or Decameth or Decaspray or Dexasone or Dexpak or Maxidex or Millicorten or Oradexon or Decaject or Decaject or Hexadrol or methylprednisolon* or (methyl adj3 prednisolone) or Metipred or Urbason or Medrol or Betamethasone or Flubenisolone or Betadexamethasone or Celestona or Cellestoderm or Celeston or Celestone or prednison* or prednisolon* or hydroxyprednisolone or desonide or Predate or Predonine or Di-Adreson-F or DiAdresonF or triamcinolon*).mp. | 72386    |
| 4                                                                   | exp SEPSIS/                                                                                                                                                                                                                                                                                                                                                                                                                                                                                                                                                                                                                                                                                                                                                                                                                                                                | 3951     |
| 5                                                                   | (Sepsis or septic or Sepses or Py?emia? or Septic?emia? or (blood adj2 poison*) or Bacter?emia? or bacill?emia? or (Lemierre* adj2 (syndrome or disease)) or necrobacillosis or meningococc?emia? or Endotoxemia? or Fung?emia? or Candid?emia? or ((Toxic or Endotox* or bacter*) adj2 Shock) or toxic forward failure or Parasitemia? or Viremia? or urosepsis).mp.                                                                                                                                                                                                                                                                                                                                                                                                                                                                                                      | 16565    |
| 6                                                                   | (1 or 2 or 3) and (4 or 5)                                                                                                                                                                                                                                                                                                                                                                                                                                                                                                                                                                                                                                                                                                                                                                                                                                                 | 1678     |

eTable 3: Inclusion criteria and exclusion criteria of including trials

| <b>Trial</b>       | <b>Inclusion criteria</b>                                                                                                                                                                                                                                                                                      | <b>Exclusion criteria</b>                                                                                                                                                                                                     |
|--------------------|----------------------------------------------------------------------------------------------------------------------------------------------------------------------------------------------------------------------------------------------------------------------------------------------------------------|-------------------------------------------------------------------------------------------------------------------------------------------------------------------------------------------------------------------------------|
| Klustersky<br>1971 | Disseminated cancer<br>Life threatening infection                                                                                                                                                                                                                                                              | Not mentioned                                                                                                                                                                                                                 |
| Schumer<br>1976    | 1. septic history;<br>2. falling blood pressure<br>3. positive aerobic or anaerobic blood cultures.                                                                                                                                                                                                            | culture was negative                                                                                                                                                                                                          |
| Sprung<br>1984     | 1. Systolic BP < 90 mmHg or decrease $\geq$ 50 mmHg<br>2. Decreased organ perfusion as evidenced as:<br>altered mental status or oliguria < 20 ml/hour<br>urine production<br>3. Persistent hypotension despite infusion $\geq$ 500 ml<br>normal saline.<br>4. Bacteremia or an identified source of infection | Improvement of blood pressure after 500 ml IS<br>Hypotension secondary to: hemorrhage, AMI,<br>cardiopulmonary arrest, acute pulmonary aspiration                                                                             |
| Bone<br>1987       | Clinical evidence of infection,<br>Fever or hypothermia<br>Tachycardia (>90 beats/min)<br>Tachypnea (>20 breaths/min)<br>Inadequate organ perfusion or organ dysfunction                                                                                                                                       | Age >75<br>Prior CST or steroid allergy<br>Uncontrolled diabetes<br>Vaccination <28 days<br>Burns<br>Pregnancy<br>Peptic ulcer < 6 months<br>TBC or fungal infection<br>Participation in another trial<br>Administration of N |
| VASSCSG<br>1987    | Clinical suspicion of sepsis and 4 of the following 7<br>signs within 8-hour period:<br><br>Shaking chills or fever<br>Tachypneu or hypocapnia<br>Tachycardia<br>Hypotension<br>Abnormal white-cell count<br>Thrombocytopenia<br>Surgical or invasive procedure performed (<48<br>hours)                       | CST <2 weeks<br>Cushing disease<br>LE <2 weeks<br>Allergy for CS<br>Body weight >132kg<br>N treatment <4 hours                                                                                                                |
| Luce 1988          | For already hospitalized patients:<br>T rise $\geq$ 1.5° C<br>Decrease in systolic BP $\geq$ 20 mm Hg<br><br>For newly admitted patients<br>T > 38.5°C or < 35.5°C<br>Systolic BP < 90 mm Hg                                                                                                                   | Pregnancy<br>Active peptic ulcer disease < 6 months<br>Allergy to CS<br>Burns<br>HIV<br>Active or prior fungal or TBC infection<br>CST < 24 hours ago<br>Diffuse pulmonary infiltrates                                        |
| Bollaert<br>1998   | Septic shock<br>MV<br>Vasopressor therapy for > 48 hours                                                                                                                                                                                                                                                       | TI LE < 1 week<br>Considered to withhold therapy<br>Gastroduodenal ulcer or GB<br>Prior CST<br>Post corticotropine [cortisol] <18 ugram/kg                                                                                    |
| Briegel<br>1999    | Septic shock<br>Vasopressor support                                                                                                                                                                                                                                                                            | Age >75<br>Pregnancy                                                                                                                                                                                                          |

|                       |                                                                                                                                                                                                                                                                                                                                                                                                                                                                                                                                                                                                                                                                                                    |                                                                                                                                                                                                                                                                                                                                                                                                                                 |
|-----------------------|----------------------------------------------------------------------------------------------------------------------------------------------------------------------------------------------------------------------------------------------------------------------------------------------------------------------------------------------------------------------------------------------------------------------------------------------------------------------------------------------------------------------------------------------------------------------------------------------------------------------------------------------------------------------------------------------------|---------------------------------------------------------------------------------------------------------------------------------------------------------------------------------------------------------------------------------------------------------------------------------------------------------------------------------------------------------------------------------------------------------------------------------|
|                       | Cardiac output > 4.0 l/min/m <sup>2</sup>                                                                                                                                                                                                                                                                                                                                                                                                                                                                                                                                                                                                                                                          | TI<br>Treatment with vasopressors for >72 hrs<br>Prior CST<br>Organ transplant recipients<br>Burns<br>Hemorrhagic shock<br>AMI < 6 months                                                                                                                                                                                                                                                                                       |
| Chawla<br>1999        | Septic shock, exact definition not specified<br>Vasopressor support in order to reach a MAP ≥ 60 mmHg for > 72 hour                                                                                                                                                                                                                                                                                                                                                                                                                                                                                                                                                                                | Not mentioned                                                                                                                                                                                                                                                                                                                                                                                                                   |
| Annane<br>2002        | Documented site or at least strong suspicion of infection<br>T > 38.3°C or < 35.6°C<br>HR < 90 beats per minute<br>Systolic BP < 90 mm Hg<br>Urinary output of less than 0.5 mL/kg of body weight for at least 1 hour or PaO <sub>2</sub> /FIO <sub>2</sub> < 280 mm Hg<br>Arterial lactate > 2 mmol/L<br>Need for MV<br>Duration of shock < 3 hours                                                                                                                                                                                                                                                                                                                                               | Pregnancy<br>Acute myocardial infarction<br>Pulmonary embolism<br>AIDS<br>Contraindication for CST                                                                                                                                                                                                                                                                                                                              |
| Yildiz<br>2002        | Sepsis, severe sepsis or septic shock<br><br>Definitions for sepsis and organ failure and guidelines for the use of innovative therapies in sepsis. Chest.1992;101(6):1644-1655.                                                                                                                                                                                                                                                                                                                                                                                                                                                                                                                   | Pre-existing adrenal disease or adrenalectomy<br>Known malignancies<br>TBC with possible involvement of the adrenal gland<br>CST < 3 months<br>Burns<br>Hemorrhagic shock<br>AMI                                                                                                                                                                                                                                                |
| Keh 2003              | Sepsis<br>Definitions for sepsis and organ failure and guidelines for the use of innovative therapies in sepsis. Chest.1992;101(6):1644-1655.                                                                                                                                                                                                                                                                                                                                                                                                                                                                                                                                                      | An age of less than 18 years,<br>glucocorticoid medication within the last 3 months,<br>immunosuppressive therapy,<br>hematologic diseases,<br>pregnancy,<br>a moribund state                                                                                                                                                                                                                                                   |
| Confaloni<br>eri 2005 | Minor criteria included<br>(1) respiratory rate greater than 30 breaths per minute at admission;<br>(2) ratios of PaO <sub>2</sub> of inspired oxygen (FiO <sub>2</sub> to fraction) (PaO <sub>2</sub> :FiO <sub>2</sub> ) less than 250;<br>(3) chest radiograph showing bilateral involvement or multilobe involvement;<br>(4) systolic blood pressure less than 90 mm Hg;<br>(5) diastolic blood pressure less than 60 mm Hg.<br>Major criteria included<br>(1) requirement of mechanical ventilation;<br>(2) increase in the size of opacities on chest radiograph of 50% or more at 48 hours;<br>(3) requirement of vasopressors for more than 4 hours; (4) serum creatinine 2 or more mg/dl. | (1) nosocomial pneumonia;<br>(2) severe immunosuppression;<br>(3) acute burn injury;<br>(4)a preexisting medical condition with a life expectancy less than 3 month;<br>(5) pregnancy;<br>(6) a major gastrointestinal bleed within 3 months of the current hospitalization;<br>(7) a condition requiring more than 0.5 mg/kg/day of prednisone equivalent (i.e., acute asthma or chronic obstructive pulmonary disease [COPD]) |
| Oppert<br>2005        | Two or more of the following: hr > 90 bpm, T ≥38.5°C or < 36°C, leukocytosis of ≥12 /nL or >10% immature cells, rr > 20 per minute, mv evidence or strong clinical suspicion of infection.                                                                                                                                                                                                                                                                                                                                                                                                                                                                                                         | Pregnancy<br>HIV positive<br>organ transplant recipients<br>CS contra-indicated                                                                                                                                                                                                                                                                                                                                                 |

|                   |                                                                                                                                                                                                                                                                                                                                                                                                                                                                                                                                                                                                                                                |                                                                                                                                                                                                                                                                                                                                           |
|-------------------|------------------------------------------------------------------------------------------------------------------------------------------------------------------------------------------------------------------------------------------------------------------------------------------------------------------------------------------------------------------------------------------------------------------------------------------------------------------------------------------------------------------------------------------------------------------------------------------------------------------------------------------------|-------------------------------------------------------------------------------------------------------------------------------------------------------------------------------------------------------------------------------------------------------------------------------------------------------------------------------------------|
|                   | arterial systolic BP <90 mm Hg for ≥1 hr despite adequate fluid resuscitation<br>CI ≥ 3.5 L/min/m <sup>2</sup> ;<br>need for vasopressor support<br>duration of septic shock < 24 hrs.                                                                                                                                                                                                                                                                                                                                                                                                                                                         | CST                                                                                                                                                                                                                                                                                                                                       |
| Tandan<br>2005    | Septic shock and adrenal insufficiency                                                                                                                                                                                                                                                                                                                                                                                                                                                                                                                                                                                                         | Not mentioned                                                                                                                                                                                                                                                                                                                             |
| Rinaldi<br>2006   | Severe sepsis according to definition of 2001 SCCM/ESICM/ACCP/ATS/SIS International Sepsis Definitions Conference                                                                                                                                                                                                                                                                                                                                                                                                                                                                                                                              | Prior illness associated with chronic microalbuminuria<br>Prior or preexisting renal failure<br>CST < 3 months<br>IST<br>Chronic hematologic diseases<br>Pregnancy<br>Septic shock<br>Therapy with endothelial active drugs                                                                                                               |
| Cicarelli<br>2007 | Septic shock exact definition not specified                                                                                                                                                                                                                                                                                                                                                                                                                                                                                                                                                                                                    | IST<br>Prior CST<br>active pancreatitis<br>TI LE < 3 months<br>Recent GB                                                                                                                                                                                                                                                                  |
| Meduri<br>2007    | Adult intubated patients receiving mechanical ventilation<br>72 h of study entry<br>diagnostic criteria for ARDS by the American-European Consensus definition<br>(61 patients had sepsis, and the author provided separate data for these participants)                                                                                                                                                                                                                                                                                                                                                                                       | Not mentioned                                                                                                                                                                                                                                                                                                                             |
| Aboab<br>2008     | Intensive care unit patients who met the American College of Chest Physicians/Society of Critical Care Medicine Consensus Conference criteria for septic shock                                                                                                                                                                                                                                                                                                                                                                                                                                                                                 | Age < 18 years<br>nonsinus rhythm, pregnancy, acute myocardial infarction, pulmonary embolism, previous treatment with corticosteroids, known autoimmune disease or immune suppression, chronic cardiovascular, pulmonary or neurologic diseases diabetes mellitus, and any other condition that may be associated with autonomic failure |
| Sprung<br>2008    | Clinical evidence of infection < 72 hours<br>Systemic response to infection defined by ≥2 of the following < 24 hours: T >38.3°C or < 35.6°C; HR >90 beats/min; RR > 20 breaths/min or PaCO <sub>2</sub> <32 mmHg or need for invasive mv; white cell count >12 cells/mm <sup>3</sup> or <4 cells/mm <sup>3</sup> or >10% immature neutrophils.<br>Evidence of shock within the previous 72 hours defined by (both a + b required):<br>Systolic BP < 90 mmHg or decrease in systolic bp > 50 mmHg for ≥1 hour despite adequate fluid replacement OR need for vasopressors ≥1 hour<br>Hypoperfusion or organ dysfunction attributable to sepsis | TI<br>LE < 24 hours<br>IST<br>Long-term CST < 6 months<br>Short-term CST < 4 weeks.                                                                                                                                                                                                                                                       |



|               |                                                                                                                                                                                                                                                                                                                                          |                                                                                                                                                                                                                                                                                                                                                                                                                                                                            |
|---------------|------------------------------------------------------------------------------------------------------------------------------------------------------------------------------------------------------------------------------------------------------------------------------------------------------------------------------------------|----------------------------------------------------------------------------------------------------------------------------------------------------------------------------------------------------------------------------------------------------------------------------------------------------------------------------------------------------------------------------------------------------------------------------------------------------------------------------|
| Hu 2009       | Severe sepsis according to definition of 2001 SCCM/ESICM/ACCP/ATS/SIS International Sepsis Definitions Conference                                                                                                                                                                                                                        | Not mentioned                                                                                                                                                                                                                                                                                                                                                                                                                                                              |
| Arabi 2010    | Cirrhosis<br>Septic shock<br>Hypotension duration < 72 hours                                                                                                                                                                                                                                                                             | Not mentioned                                                                                                                                                                                                                                                                                                                                                                                                                                                              |
| Snijders 2010 | Adults with severe community-acquired pneumonia                                                                                                                                                                                                                                                                                          | Not mentioned                                                                                                                                                                                                                                                                                                                                                                                                                                                              |
| Meijvis 2011  | 1. 18 years or older<br>2. confirmed community acquired pneumonia                                                                                                                                                                                                                                                                        | a known congenital or acquired immunodeficiency<br>receipt of chemotherapy any dose of oral corticosteroids, or immunosuppressive medication in the previous 6 weeks<br>haematological malignant disease.                                                                                                                                                                                                                                                                  |
| Sabry 2011    | Unclear                                                                                                                                                                                                                                                                                                                                  | Not mentioned                                                                                                                                                                                                                                                                                                                                                                                                                                                              |
| Yildiz 2011   | Sepsis or septic shock<br>Definitions for sepsis and organ failure and guidelines for the use of innovative therapies in sepsis. Chest.1992;101(6):1644-1655.                                                                                                                                                                            | Pre-existing adrenal disease or adrenalectomy<br>Known malignancies<br>TBC with possible involvement of the adrenal gland<br>CST < 3 months<br>Burns<br>Hemorrhagic shock<br>AMI                                                                                                                                                                                                                                                                                           |
| Liu 2012      | Adults with ARDS and sepsis, including septic shock                                                                                                                                                                                                                                                                                      | Not mentioned                                                                                                                                                                                                                                                                                                                                                                                                                                                              |
| Rezk 2013     | Unclear                                                                                                                                                                                                                                                                                                                                  | Not mentioned                                                                                                                                                                                                                                                                                                                                                                                                                                                              |
| Gordon 2014   | adult patients (≥ 16 yr) who had sepsis (2/4 systemic inflammatory response criteria due to known or suspected infection) and who required vasopressors despite adequate IV fluid resuscitation.                                                                                                                                         | Prior IV vasopressor<br>Adrenal insufficiency<br>CST < 3 months<br>ESRD<br>MI, RP, SS<br>AMI<br>LE < 24 hours<br>Pregnancy<br>Enrolment in another trial that might interact with the study drugs, or hypersensitivity to any of the study drugs                                                                                                                                                                                                                           |
| Huang 2014    | Severe sepsis according to definition of 2001 SCCM/ESICM/ACCP/ATS/SIS International Sepsis Definitions Conference                                                                                                                                                                                                                        | Not mentioned                                                                                                                                                                                                                                                                                                                                                                                                                                                              |
| Torres 2015   | (1) were aged 18 years or older,<br>(2) had clinical symptoms suggesting community-acquired pneumonia (cough, fever, pleuritic chest pain, or dyspnea),<br>(3) had a new chest radiographic infiltrate,<br>(4) met severe community-acquired pneumonia<br>(5) had a C-reactive protein (CRP) level of greater than 150 mg/L at admission | (1) prior treatment with systemic corticosteroids,<br>(2) nosocomial pneumonia,<br>(3) reported severe immunosuppression<br>(4) preexisting medical condition with a life expectancy of less than 3 months,<br>(5) uncontrolled diabetes mellitus,<br>(6) major gastrointestinal bleeding within 3 months, or<br>(7) a condition requiring acute treatment with greater than 1 mg/kg/d of methylprednisolone or its equivalent.<br>(8) pandemic H1N1 influenza A pneumonia |
| Gordon 2016   | Adult patients (≥16 years) who had sepsis (2 of 4 systemic                                                                                                                                                                                                                                                                               | patients who had received a previous continuous infusion of vasopressors during this ICU                                                                                                                                                                                                                                                                                                                                                                                   |

|                |                                                                                                                                                                                                                                                                                                                                                                                                                                                                                                                                   |                                                                                                                                                                                                                                                                                                                                                                                                                                                                                                                                                                                                                                                                                                                                                                                                                                                                                |
|----------------|-----------------------------------------------------------------------------------------------------------------------------------------------------------------------------------------------------------------------------------------------------------------------------------------------------------------------------------------------------------------------------------------------------------------------------------------------------------------------------------------------------------------------------------|--------------------------------------------------------------------------------------------------------------------------------------------------------------------------------------------------------------------------------------------------------------------------------------------------------------------------------------------------------------------------------------------------------------------------------------------------------------------------------------------------------------------------------------------------------------------------------------------------------------------------------------------------------------------------------------------------------------------------------------------------------------------------------------------------------------------------------------------------------------------------------|
|                | inflammatory response criteria due to known or suspected infection and who required vasopressors despite adequate intravenous fluid resuscitation                                                                                                                                                                                                                                                                                                                                                                                 | admission, an ongoing requirement for systemic steroid treatment (ie, known adrenal insufficiency or regular systemic steroid therapy within the last 3 months), end-stage kidney failure, known mesenteric ischemia, Raynaud phenomenon, systemic sclerosis or other vasospastic disease, a medical team that was not committed to full active treatment, known pregnancy, enrollment in another interventional trial that might interact with the study drugs, or hypersensitivity to any of the study drugs                                                                                                                                                                                                                                                                                                                                                                 |
| Keh 2016       | Sepsis<br>Definitions for sepsis and organ failure and guidelines for the use of innovative therapies in sepsis. Chest.1992;101(6):1644-1655.                                                                                                                                                                                                                                                                                                                                                                                     | <ol style="list-style-type: none"> <li>1. septic shock</li> <li>2. younger than 18 years,</li> <li>3. having known hypersensitivity to hydrocortisone or mannitol (placebo),</li> <li>4. having a history of glucocorticoid medication</li> </ol>                                                                                                                                                                                                                                                                                                                                                                                                                                                                                                                                                                                                                              |
| Tongyoo 2016   | severe sepsis or septic receiving mechanical ventilation for ARDS aged 18 years or older                                                                                                                                                                                                                                                                                                                                                                                                                                          | <ol style="list-style-type: none"> <li>1. moribund state</li> <li>2. advanced malignancy with life expectancy &lt;6 months, pregnancy, immunosuppressive therapy,</li> <li>3. underlying disease requiring long-term glucocorticoid treatment within the last 6 months or short-term glucocorticoid treatment within the past 4 weeks,</li> <li>4. difficult-to-control diabetes.</li> </ol>                                                                                                                                                                                                                                                                                                                                                                                                                                                                                   |
| Lv 2017        | age 18 years old or older;<br>onset of septic shock within 6 h                                                                                                                                                                                                                                                                                                                                                                                                                                                                    | Systemic corticosteroid therapy within the last 3 months before septic shock;<br>high-dose steroid therapy;<br>immunosuppression;<br>refusal of the attending staff or patient family.                                                                                                                                                                                                                                                                                                                                                                                                                                                                                                                                                                                                                                                                                         |
| Annane 2018    | hospitalized in intensive care unit for less than 7 days<br>septic shock for less than 24 hours<br>at least one proven site of infection<br>at least 2 organ dysfunctions as defined by a SOFA score $\geq$ 3 for at least 6 consecutive hours<br>need for vasopressor (dopamine $\geq$ 15 $\mu$ g/kg/min or epinephrine/norepinephrine at $\geq$ 0,25 $\mu$ g/kg/min for at least 6 consecutive hours, to maintain systolic arterial pressure at 90 mmHg or more OR mean arterial pressure at 6 mmHg or more<br>informed consent | <p>pregnancy or breast feeding, decision not to resuscitate; underlying disease with an estimated life expectancy of less than 1 month; formal indication for corticosteroids, recent surgery (ie within the past 72 hours) or a surgery at high risk of bleeding; gastrointestinal bleeding within the past 6 weeks; chronic liver disease (Child C); recent trauma (ie within the past 72 hours)</p> <p>intracranial process; history of stroke, CNS bleeding or traumatic brain injury within the past 3 months;<br/>platelet counts of less than 30000 per cubic millimetre; formal indication for curative anticoagulant; prophylactic use of heparin is allowed; any condition of high risk of bleeding as per patient's primary physicians; hypersensitivity of activated drotrecogin alpha or any other component of the drug; no affiliation to a social security</p> |
| Venkatesh 2018 | adults ( $\geq$ 18 years of age)<br>undergoing mechanical ventilation,<br>fulfilled two or more criteria of the systemic inflammatory response syndrome,                                                                                                                                                                                                                                                                                                                                                                          | <ol style="list-style-type: none"> <li>1. received treatment with systemic glucocorticoids for an indication other than septic shock,</li> <li>2. received etomidate during the current hospital admission,</li> </ol>                                                                                                                                                                                                                                                                                                                                                                                                                                                                                                                                                                                                                                                         |

|  |                                                                                                                                  |                                                                                                                                                                                                    |
|--|----------------------------------------------------------------------------------------------------------------------------------|----------------------------------------------------------------------------------------------------------------------------------------------------------------------------------------------------|
|  | patients had been treated with vasopressors or inotropic agents for a minimum of 4 hours up to and at the time of randomization. | 3. considered to be likely to die from a preexisting disease within 90 days after randomization or had treatment limitations in place<br>4. met all the inclusion criteria for more than 24 hours. |
|--|----------------------------------------------------------------------------------------------------------------------------------|----------------------------------------------------------------------------------------------------------------------------------------------------------------------------------------------------|

eTable 4: Support for judgement for included trials rated as high risk of bias.

| <b>Study</b>    | <b>Bias</b>                            | <b>Support for judgement</b>                                                                                                             |
|-----------------|----------------------------------------|------------------------------------------------------------------------------------------------------------------------------------------|
| Aboab 2010      | Other bias                             | Expected sample size was 150 participants. Due to slow recruitment, trial terminated prematurely after enrolment of 75 participants.     |
| Bollaert 1998   | Other bias                             | Trial terminated prematurely                                                                                                             |
| Briegel 1999    | Selective reporting                    | 7-day, 28-day and hospital mortality were present in protocol but not reported in the article.                                           |
| Gordon 2014     | Blinding of participants and personnel | open-label                                                                                                                               |
|                 | Blinding of outcome assessment         | open-label                                                                                                                               |
| Hu 2009         | Selective reporting                    | No trial registration                                                                                                                    |
| Klastersky 1971 | Other bias                             | Baseline imbalance                                                                                                                       |
| Luce 1988       | Incomplete outcome data                | Only 75/87 participants were included to assess outcomes.                                                                                |
| Lv 2017         | Selective reporting                    | 90-day mortality were present in protocol but not reported in the article.                                                               |
|                 | Other bias                             | Baseline imbalance                                                                                                                       |
| Medrui 2007     | Selective reporting                    | Shock at day 7, ventilator free days, ICU free days were present in protocol but not reported in the article.                            |
| Oppert 2005     | Selective reporting                    | No trial registration                                                                                                                    |
| Rinaldi 2006    | Blinding of participants and personnel | open-label                                                                                                                               |
|                 | Blinding of outcome assessment         | open-label                                                                                                                               |
|                 | Incomplete outcome data                | 40 of 52 participants were included to assess outcomes.                                                                                  |
| Schumer 1976    | Random sequence generation             | Using card system                                                                                                                        |
|                 | Allocation concealment                 | Unsealed envelopes                                                                                                                       |
| Sprung 1984     | Allocation concealment                 | Not clear how randomization list was kept confidential                                                                                   |
|                 | Other bias                             | Baseline imbalance                                                                                                                       |
| Sprung 2008     | Incomplete outcome data                | All except 1 participants were included to assess primary outcome, but only 466/500 participants were included to assess adverse events. |
|                 | Other bias                             | Expected sample size was 800 participants. Due to slow recruitment, trial terminated prematurely after enrolment of 500 participants;    |

eTable 5: Sensitivity analyses

| Sensitivity analyses                                                            | RR, 95% CI        | I <sup>2</sup> | P      |
|---------------------------------------------------------------------------------|-------------------|----------------|--------|
| Excluding studies only reported as abstracts                                    | 0.89 [0.81, 0.98] | 30%            | 0.02   |
| Excluding studies published earlier than 2000                                   | 0.92 [0.86, 0.98] | 0%             | 0.01   |
| Excluding studies reported ICU or hospital mortality                            | 0.89 [0.80, 0.99] | 35%            | 0.03   |
| Excluding studies with non-low risk of bias                                     | 0.90 [0.83, 0.97] | 0%             | 0.005  |
| Excluding trials with <10 events                                                | 0.91 [0.83, 0.99] | 26%            | 0.03   |
| Excluding trials with <200 patients                                             | 0.90 [0.82, 0.99] | 0%             | 0.04   |
| using fixed-effect models                                                       | 0.89 [0.83, 0.95] | 27%            | 0.0005 |
| Using adjusted odds/risk/hazard ratios with the generic inverse variance method | 0.89 [0.80, 0.98] | 30%            | 0.01   |

e Figure 1: Risk of bias summary: review authors' judgements about each risk of bias item for each included study.

|                   | Random sequence generation (selection bias) | Allocation concealment (selection bias) | Blinding of participants and personnel (performance bias) | Blinding of outcome assessment (detection bias) | Incomplete outcome data (attrition bias) | Selective reporting (reporting bias) | Other bias |
|-------------------|---------------------------------------------|-----------------------------------------|-----------------------------------------------------------|-------------------------------------------------|------------------------------------------|--------------------------------------|------------|
| Aboab 2008        | +                                           | +                                       | +                                                         | ?                                               | +                                        | ?                                    | ?          |
| Annane 2002       | +                                           | +                                       | +                                                         | +                                               | +                                        | +                                    | +          |
| Annane 2018       | +                                           | +                                       | +                                                         | +                                               | +                                        | +                                    | +          |
| Arabi 2010        | +                                           | +                                       | ?                                                         | +                                               | +                                        | +                                    | -          |
| Bollaert 1998     | +                                           | +                                       | +                                                         | +                                               | +                                        | +                                    | -          |
| Bone 1987         | +                                           | +                                       | +                                                         | +                                               | +                                        | ?                                    | +          |
| Briegel 1999      | +                                           | +                                       | +                                                         | +                                               | +                                        | -                                    | +          |
| Chawla 1999       | +                                           | +                                       | +                                                         | +                                               | +                                        | +                                    | +          |
| Cicarelli 2007    | +                                           | +                                       | +                                                         | +                                               | ?                                        | +                                    | ?          |
| Confalonieri 2005 | +                                           | +                                       | +                                                         | +                                               | +                                        | +                                    | +          |
| Gordon 2014       | +                                           | +                                       | -                                                         | -                                               | +                                        | +                                    | +          |
| Gordon 2016       | +                                           | +                                       | +                                                         | +                                               | +                                        | +                                    | +          |
| Hu 2009           | +                                           | ?                                       | ?                                                         | ?                                               | ?                                        | -                                    | ?          |
| Huang 2014        | +                                           | +                                       | ?                                                         | ?                                               | +                                        | +                                    | +          |
| Keh 2003          | +                                           | +                                       | +                                                         | +                                               | +                                        | +                                    | +          |
| Keh 2016          | +                                           | +                                       | +                                                         | +                                               | +                                        | +                                    | +          |
| Klastersky 1971   | ?                                           | ?                                       | +                                                         | ?                                               | ?                                        | +                                    | -          |
| Liu 2012          | +                                           | ?                                       | ?                                                         | ?                                               | ?                                        | ?                                    | ?          |
| Luce 1988         | +                                           | +                                       | +                                                         | +                                               | -                                        | +                                    | +          |
| Lv 2017           | +                                           | +                                       | +                                                         | +                                               | ?                                        | -                                    | -          |
| Medrui 2007       | +                                           | +                                       | +                                                         | +                                               | +                                        | -                                    | +          |
| Meijvis 2011      | +                                           | +                                       | +                                                         | +                                               | +                                        | +                                    | +          |
| Oppert 2005       | +                                           | +                                       | +                                                         | +                                               | +                                        | -                                    | ?          |
| Rezk 2013         | ?                                           | ?                                       | ?                                                         | ?                                               | +                                        | ?                                    | ?          |
| Rinaldi 2006      | +                                           | +                                       | -                                                         | -                                               | -                                        | ?                                    | +          |
| Sabry 2011        | ?                                           | ?                                       | ?                                                         | ?                                               | +                                        | ?                                    | ?          |
| Schumer 1976      | -                                           | -                                       | ?                                                         | ?                                               | +                                        | ?                                    | ?          |
| Snijders 2010     | +                                           | +                                       | +                                                         | +                                               | +                                        | +                                    | ?          |
| Sprung 1984       | +                                           | -                                       | +                                                         | +                                               | +                                        | +                                    | -          |
| Sprung 2008       | +                                           | +                                       | +                                                         | +                                               | -                                        | +                                    | -          |
| Tandan 2005       | +                                           | +                                       | +                                                         | +                                               | ?                                        | ?                                    | +          |
| Tongyoo 2016      | +                                           | +                                       | +                                                         | +                                               | +                                        | +                                    | +          |
| Torres 2015       | +                                           | +                                       | +                                                         | +                                               | +                                        | +                                    | +          |
| VASSCSG 1987      | +                                           | +                                       | +                                                         | +                                               | +                                        | +                                    | ?          |
| Venkatesh 2018    | +                                           | +                                       | +                                                         | +                                               | +                                        | +                                    | +          |
| Yildiz 2002       | +                                           | +                                       | +                                                         | +                                               | +                                        | ?                                    | ?          |
| Yildiz 2011       | +                                           | +                                       | +                                                         | +                                               | +                                        | +                                    | ?          |

e Figure 2: Risk of bias graph: review authors' judgements about each risk of bias item presented as percentages across all included studies

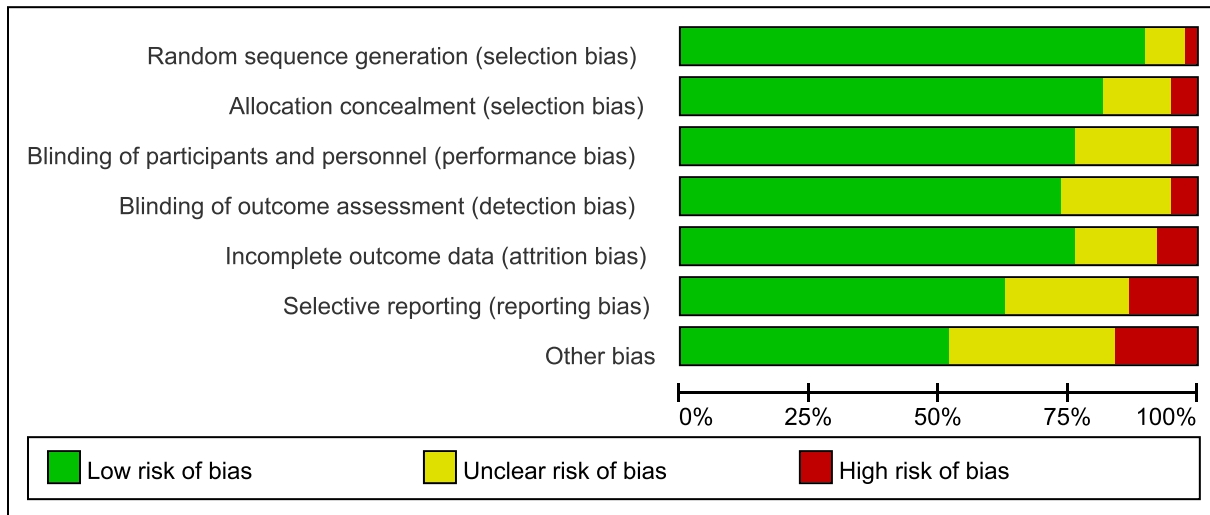

e Figure 3: Trial sequential analysis for 28 days mortality

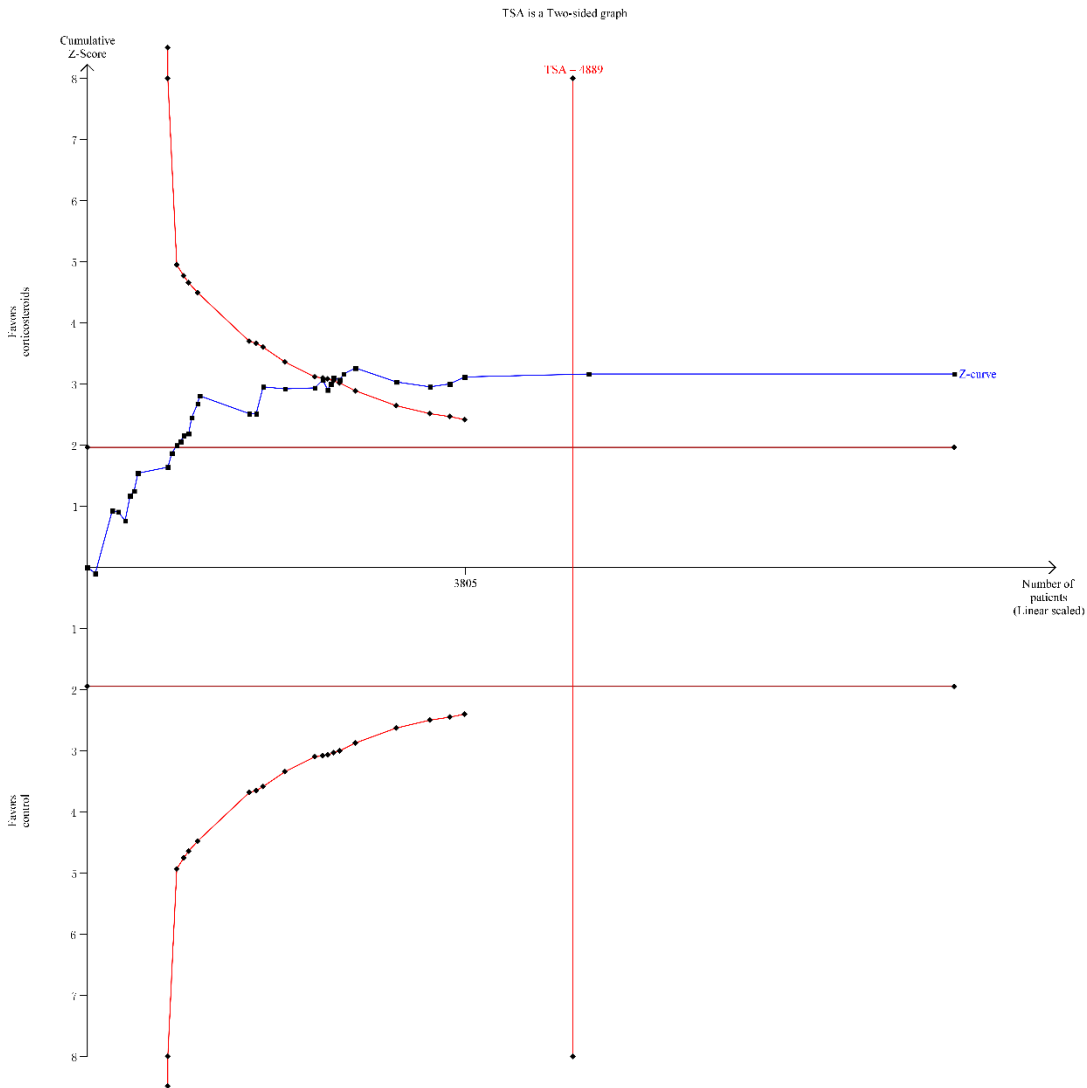

A DIS of 4899 patients was calculated based on an anticipated RRR of 20% (event proportion of 29% in the control arm,  $\alpha=0.05$  (two-sided),  $\beta=0.20$  (power 80%)). The blue cumulative z-curve was constructed using a random-effects model and crossed the boundary for futility.



e Figure 4: Trial sequential analysis for 90 days mortality

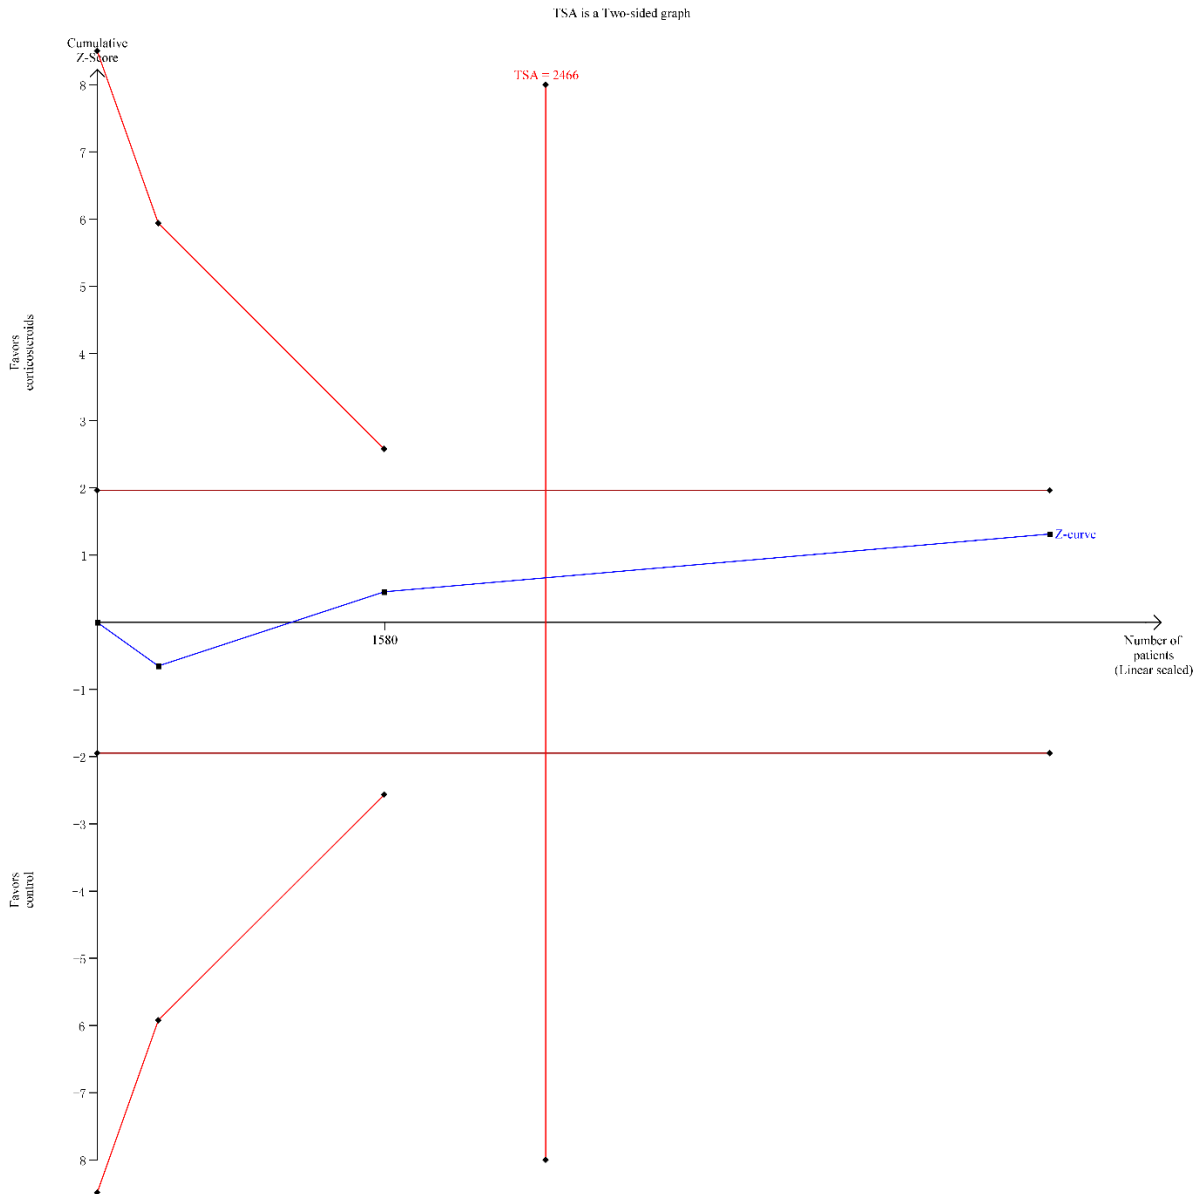

DIS of 2466 patients was calculated based on an anticipated RRR of 20% (event proportion of 33% in the control arm,  $\alpha=0.05$  (two-sided),  $\beta=0.20$  (power 80%)). The blue cumulative z-curve was constructed using a random-effects model and crossed the boundary for futility.

Funnel plot of comparison: 1 Steroids versus control, outcome: 28-Day mortality.

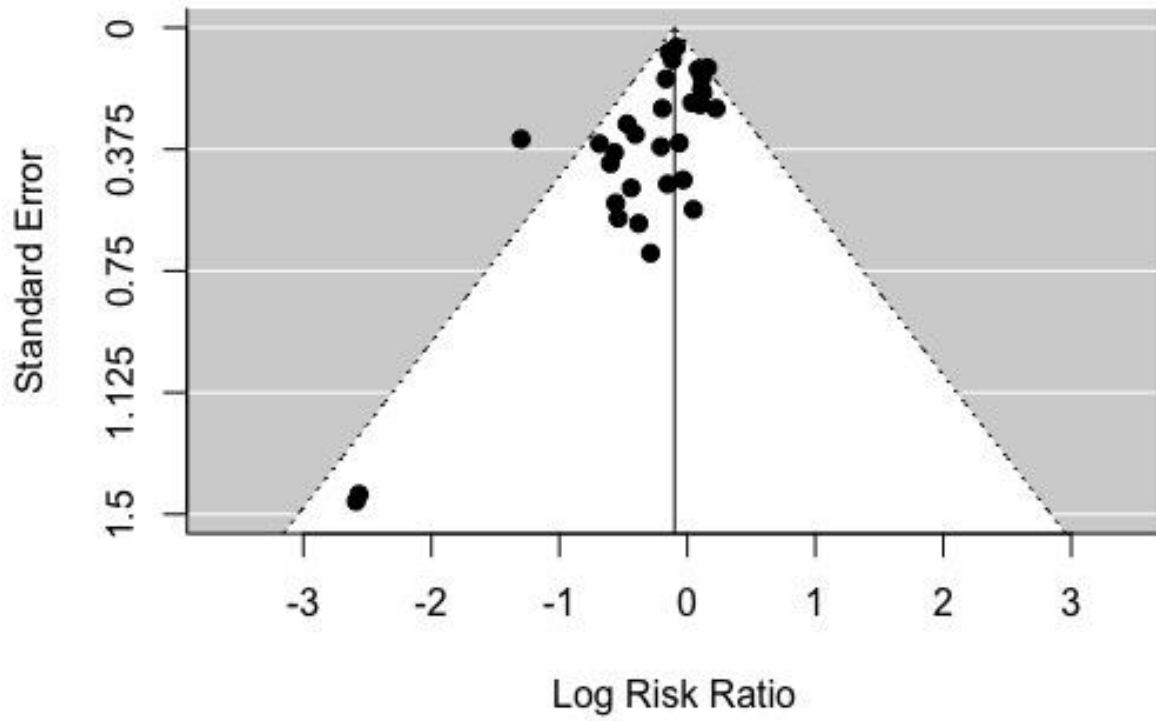

eFigure 6: Subgroup analysis for 28 days mortality –based on dose of corticosteroid. df = degrees of freedom, M-H = Mantel-Haenszel.

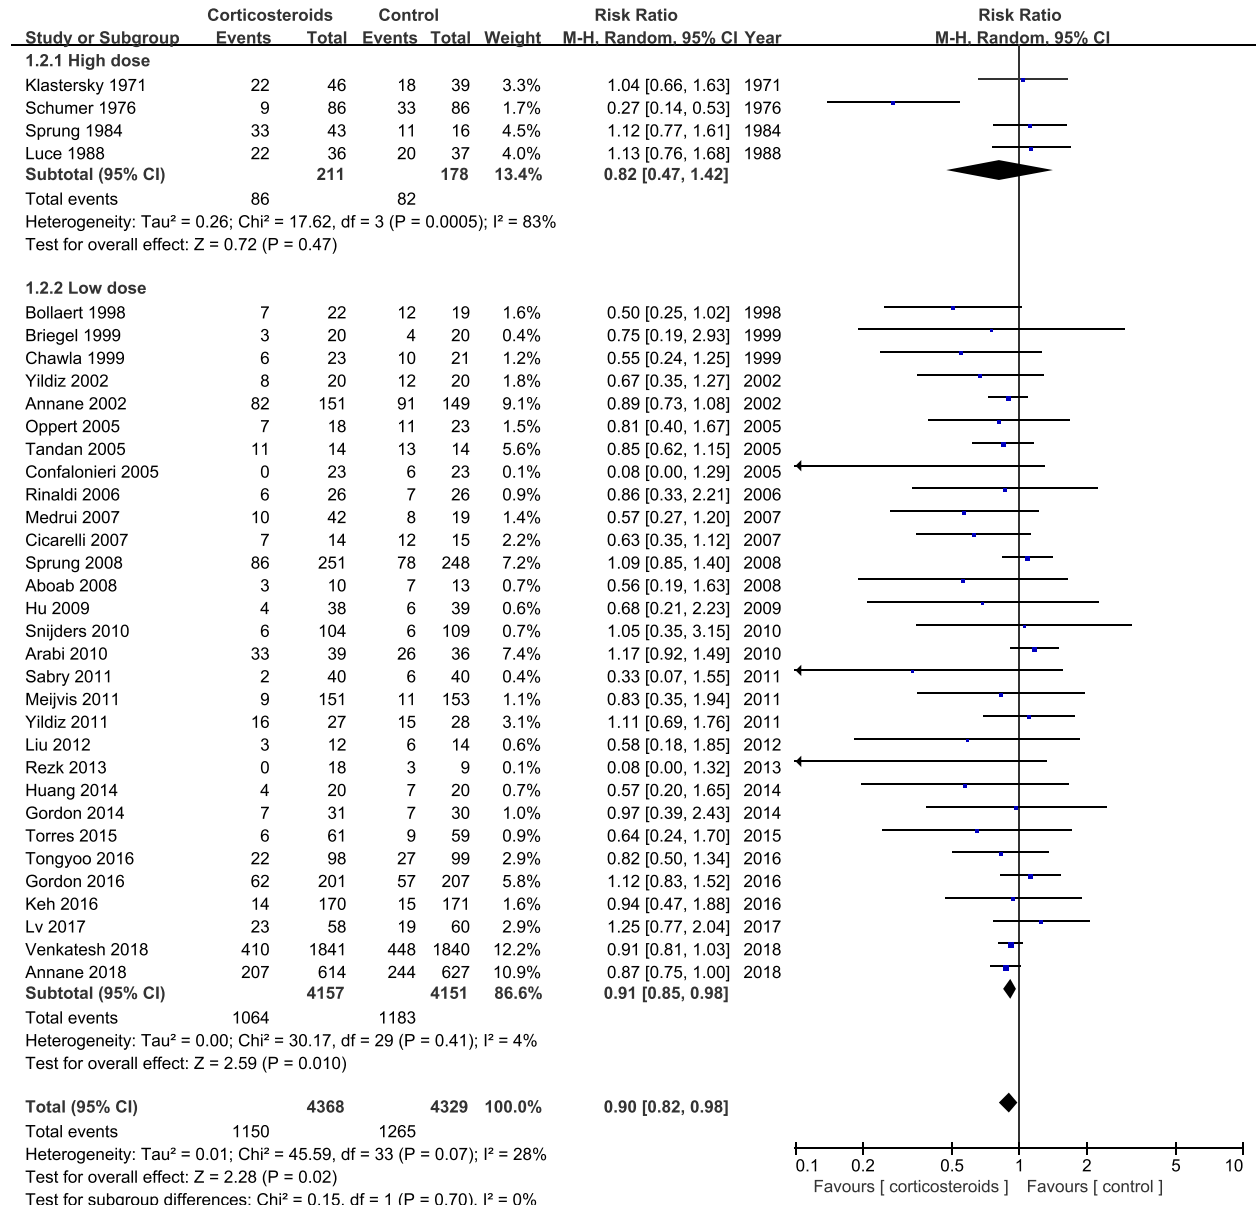

eFigure 7: Subgroup analysis for 28 days mortality –based on treatment duration.  
df = degrees of freedom, M-H = Mantel-Haenszel.

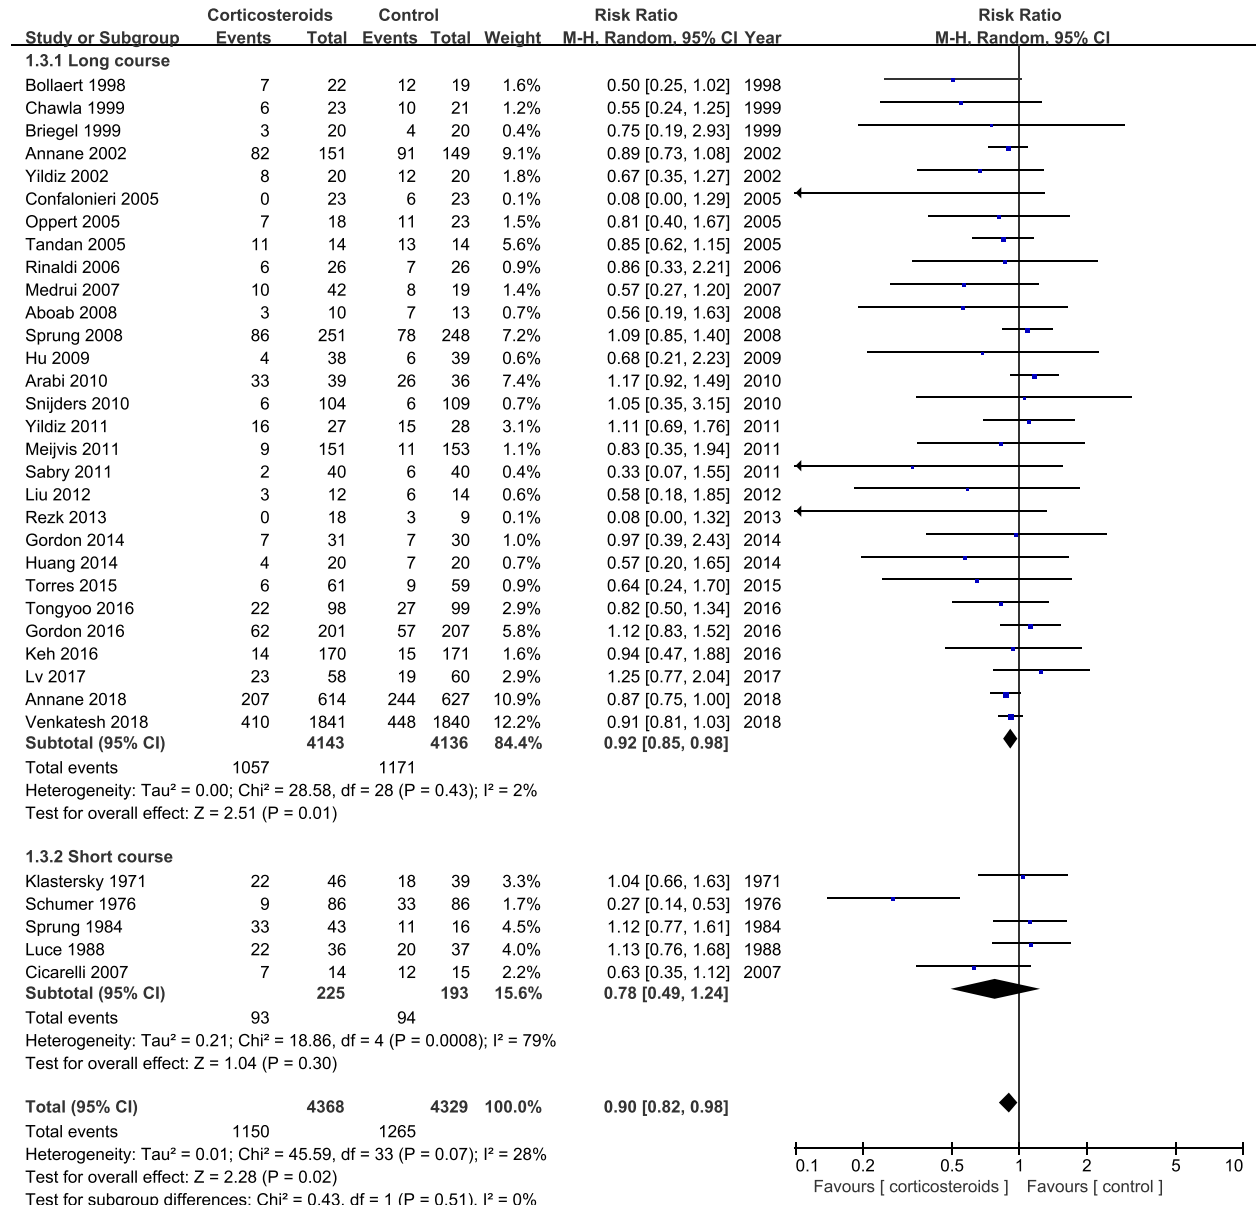

eFigure 8: Subgroup analysis for 28 days mortality –based on sepsis population subtype. df = degrees of freedom, M-H = Mantel-Haenszel.

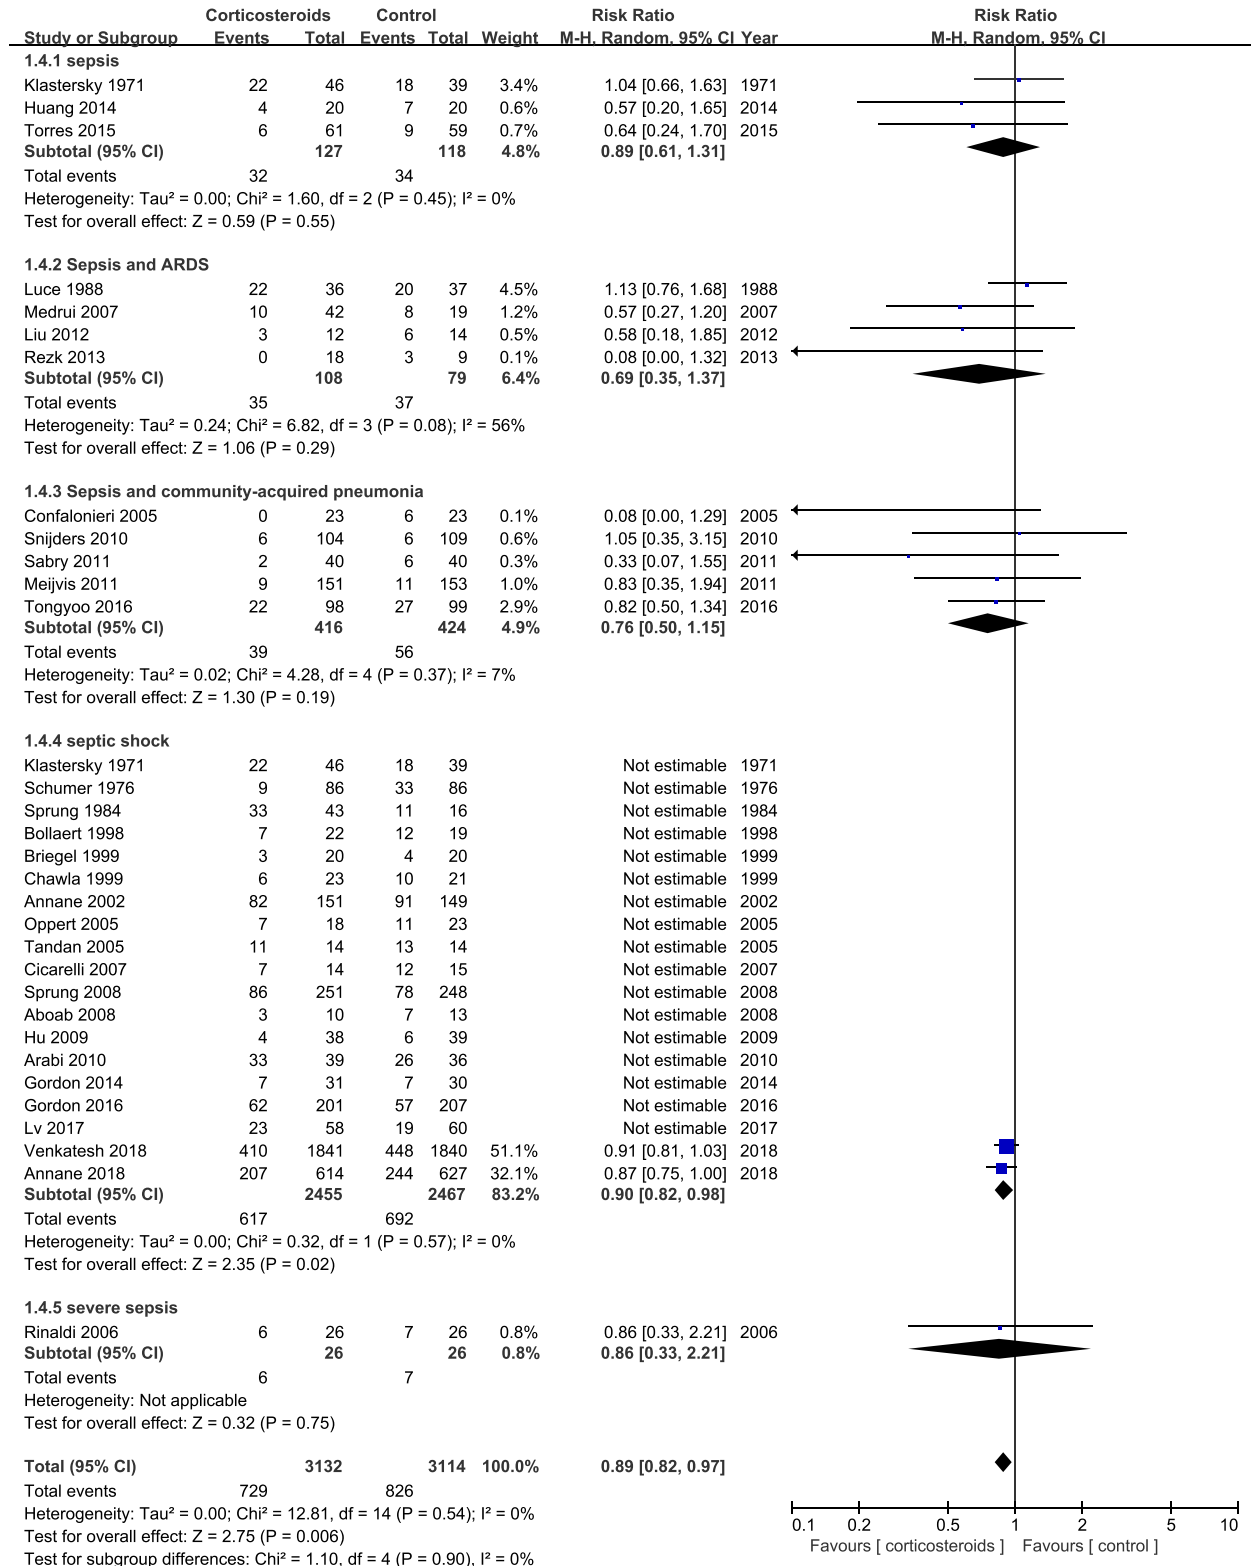

eFigure 9: Subgroup analysis for 28 days mortality –based on type of corticosteroids. df = degrees of freedom, M-H = Mantel-Haenszel.

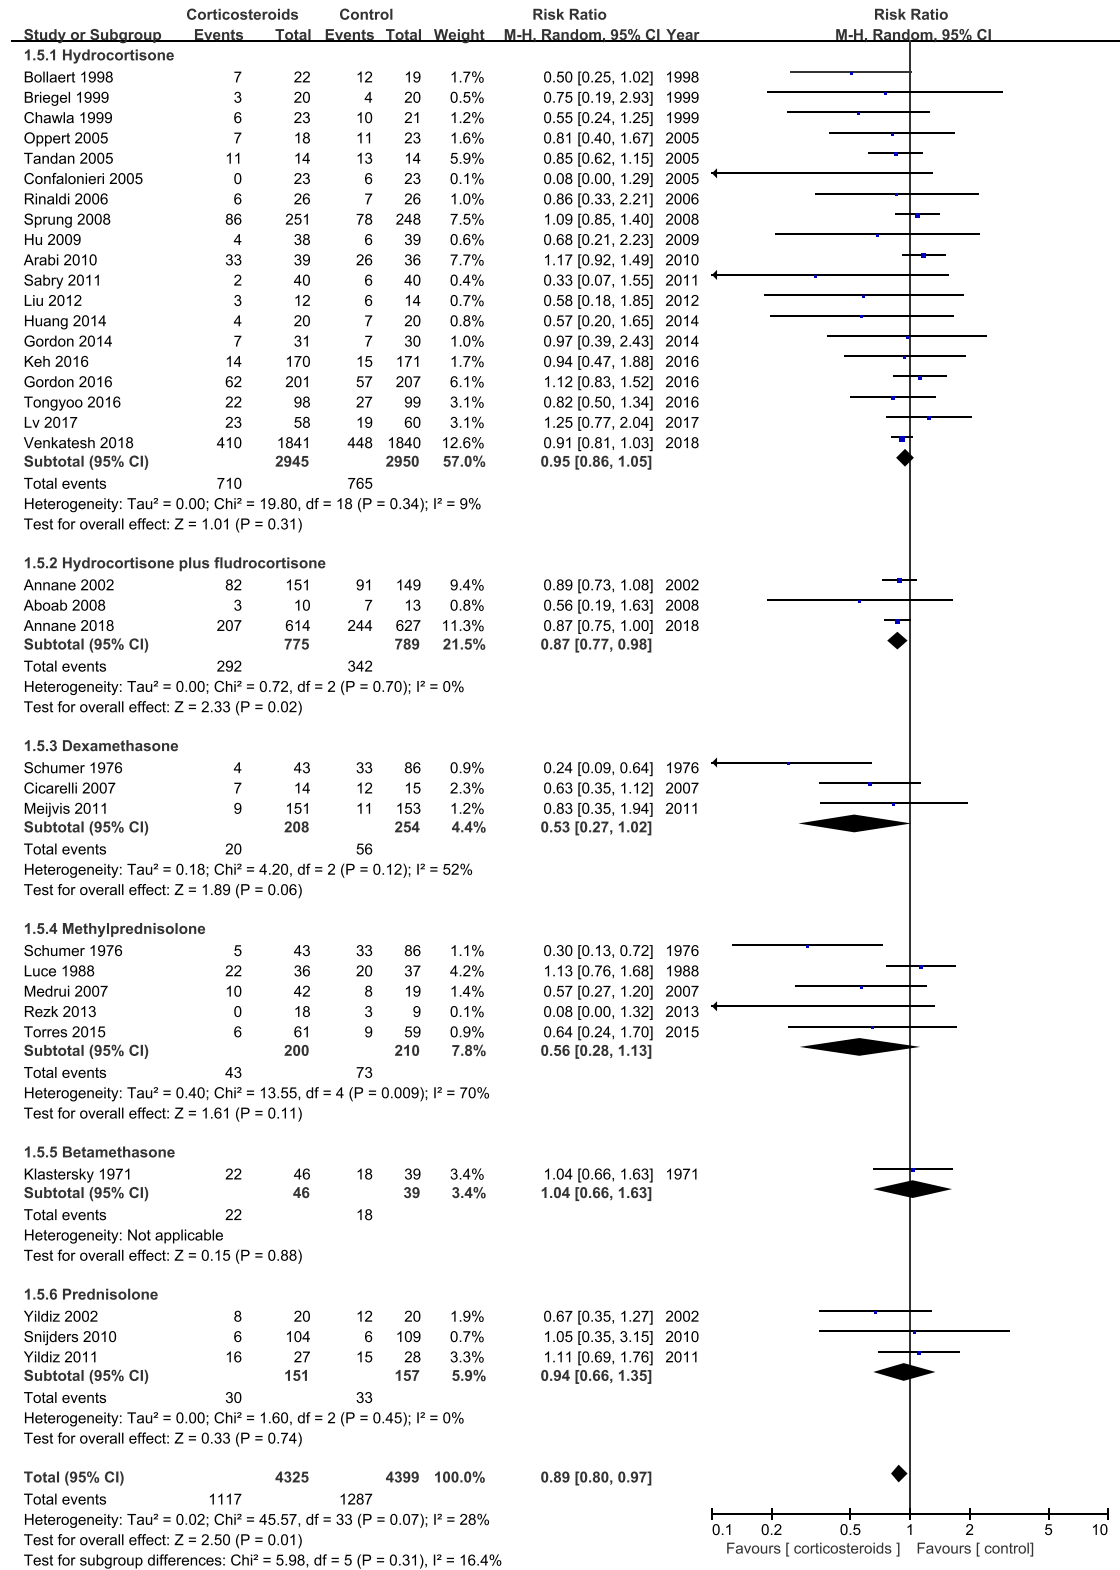

eFigure 10: Subgroup analysis for 28 days mortality –based on control group mortality. df = degrees of freedom, M-H = Mantel-Haenszel.

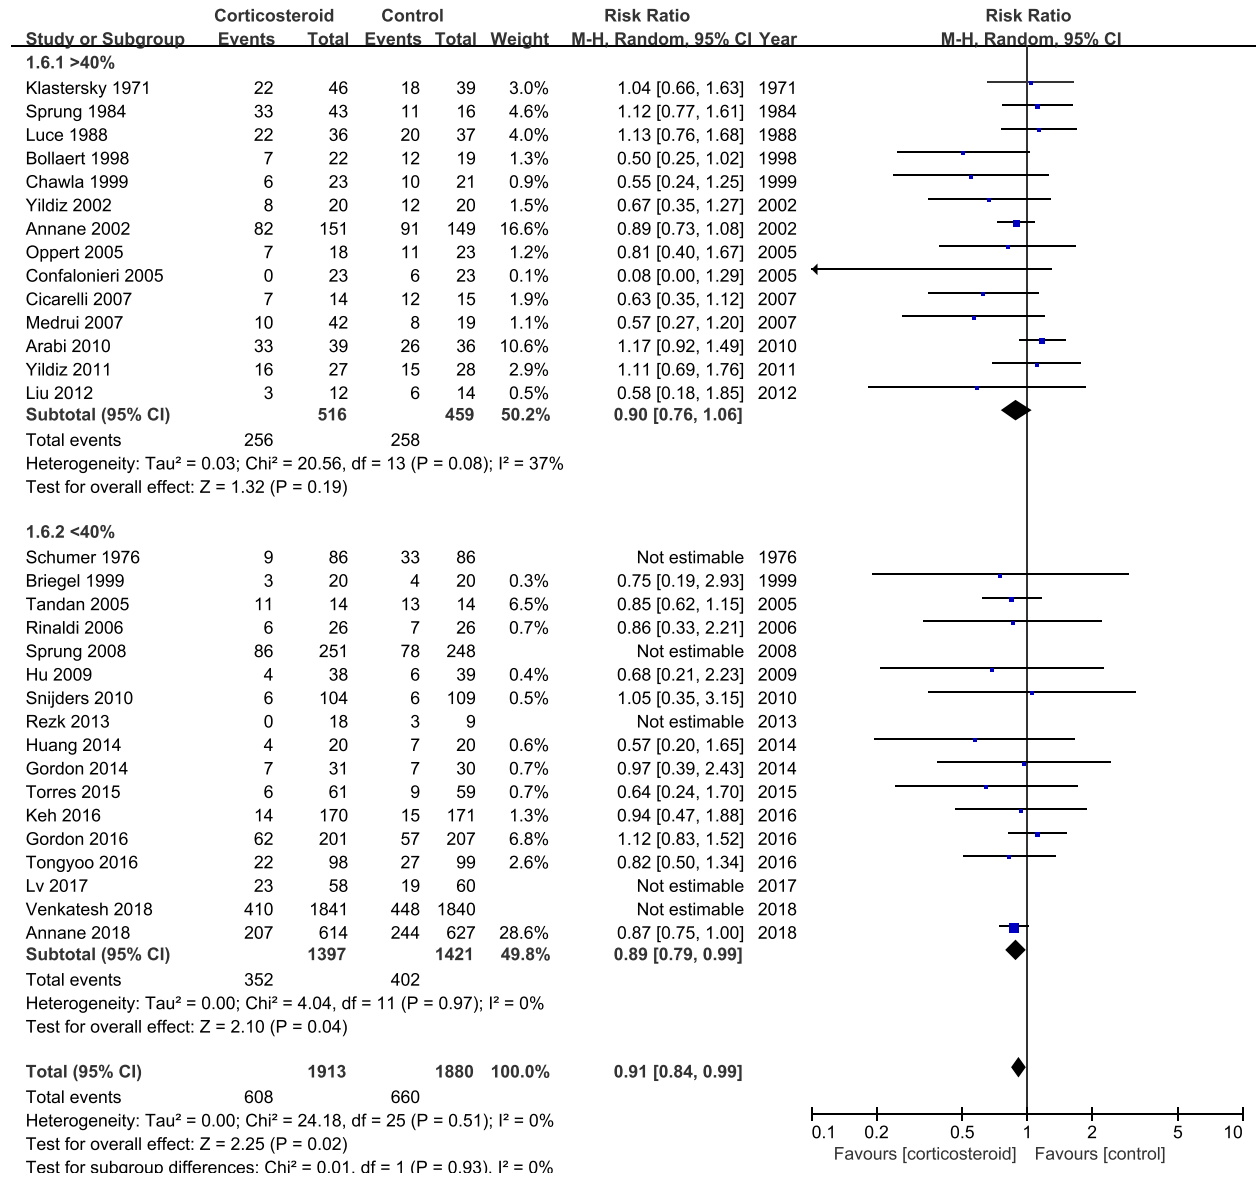

eFigure 11: Meta-regression for 28-day mortality outcome by control group mortality

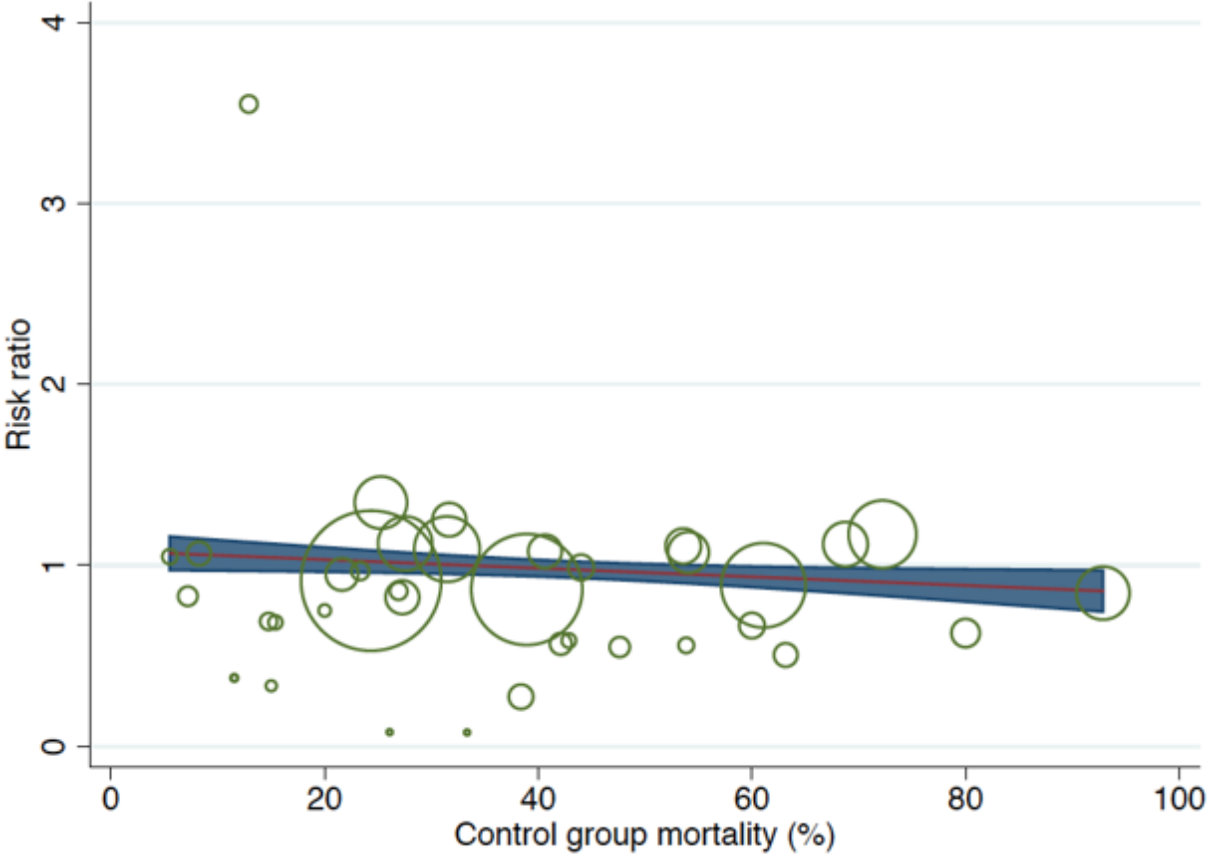



eFigure 12: Meta-regression for 28-day mortality outcome by year of study publication

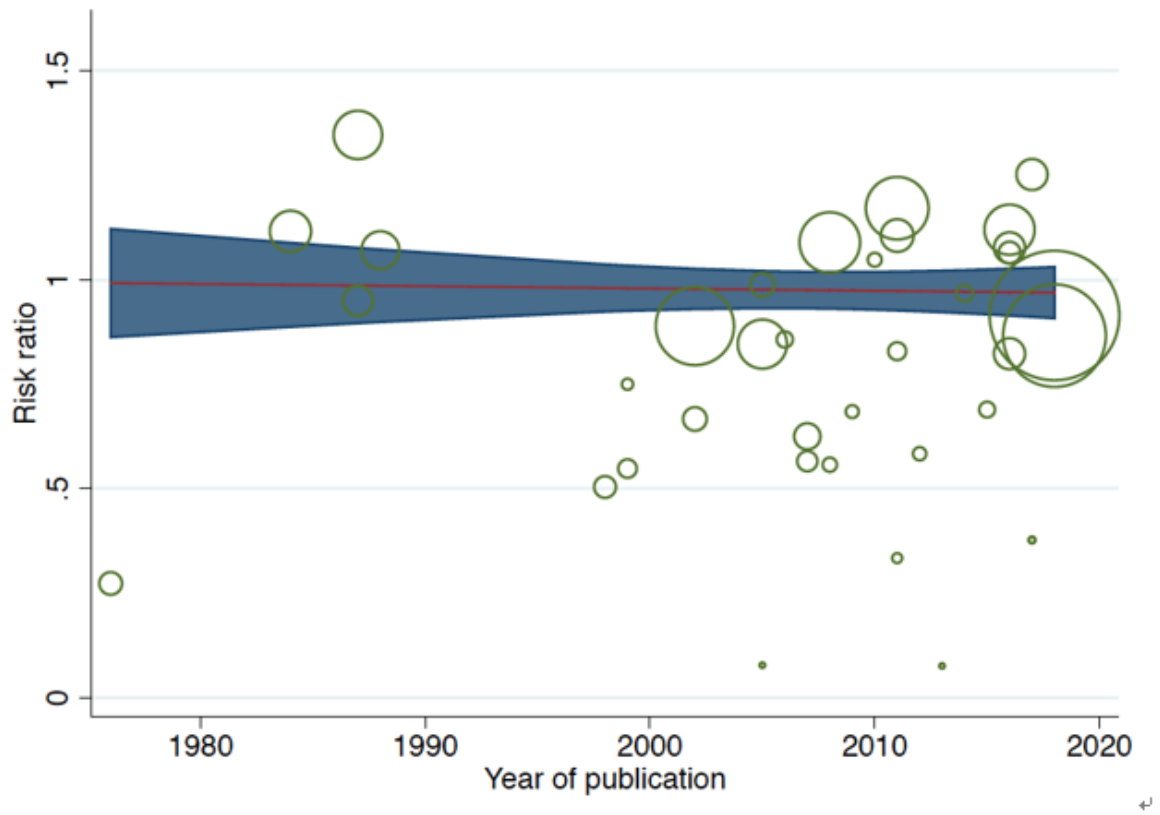

eFigure 13: Forest plot for 90-day mortality. df = degrees of freedom, M-H = Mantel-Haenszel.

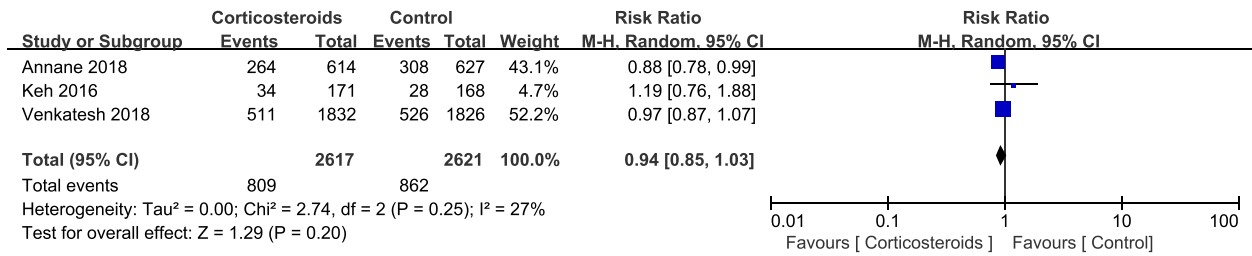

eFigure 14: Forest plot for ICU mortality. df = degrees of freedom, M-H = Mantel-Haenszel.

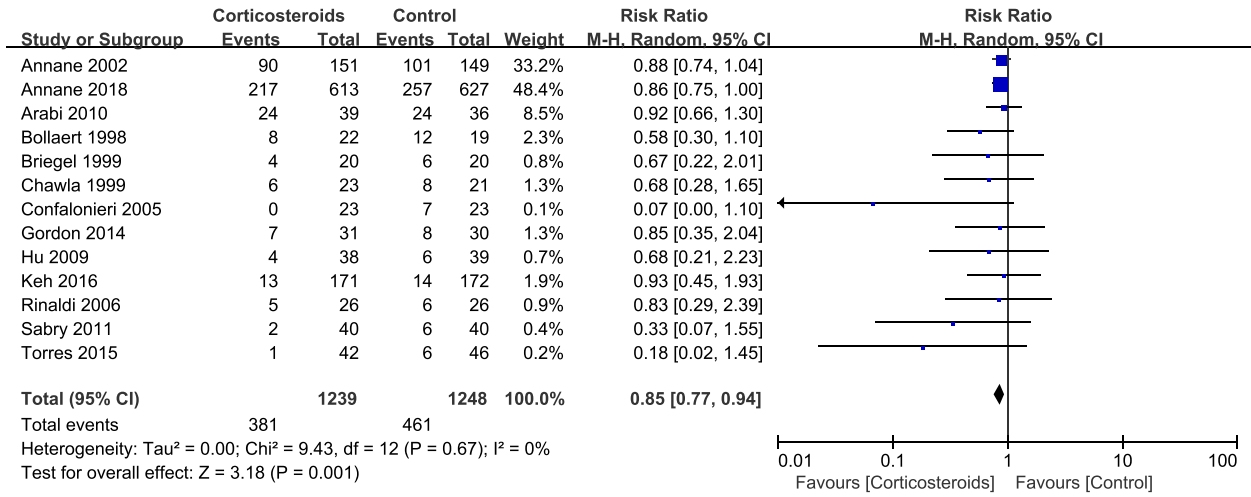

eFigure 15: Forest plot for hospital mortality. df = degrees of freedom, M-H = Mantel-Haenszel.

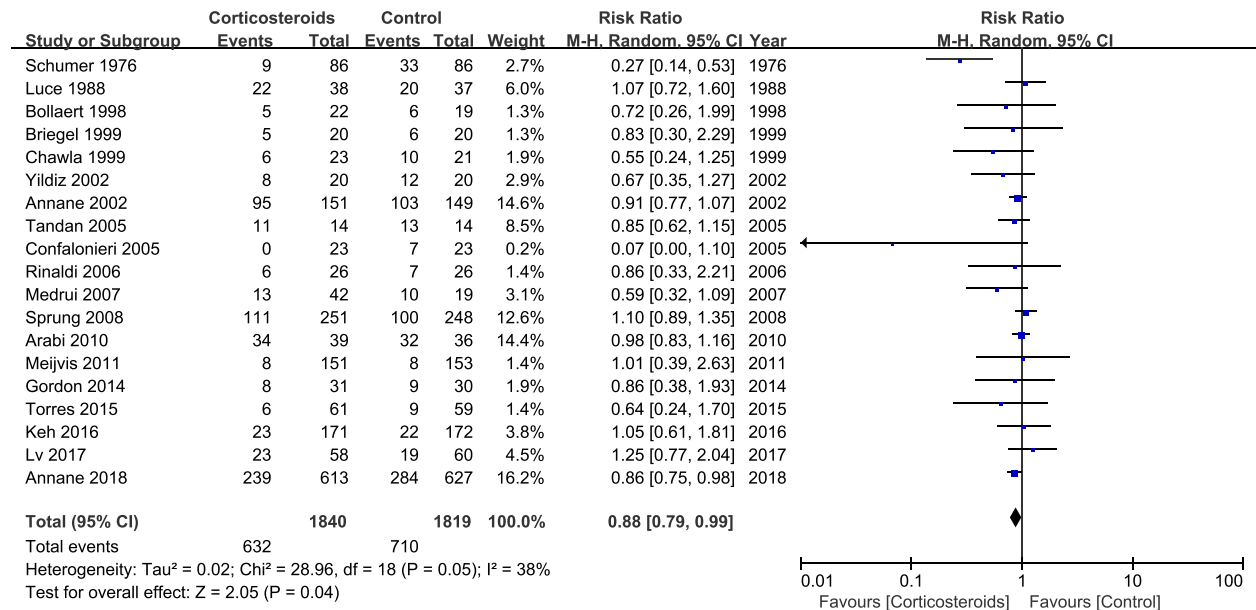

eFigure 16: Forest plot for length of stay in hospital. df = degrees of freedom, M-H = Mantel-Haenszel.

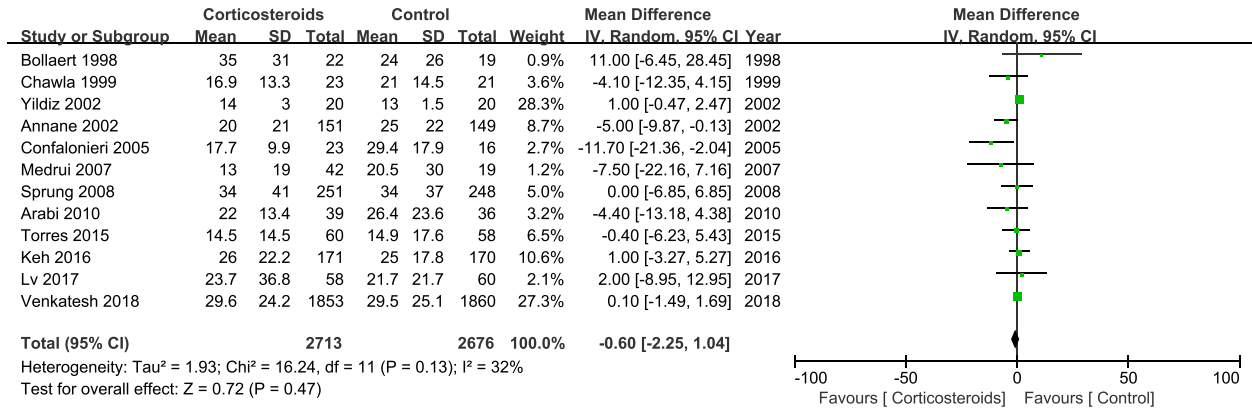

eFigure 17: Forest plot for length of stay in ICU. df = degrees of freedom, M-H = Mantel-Haenszel.

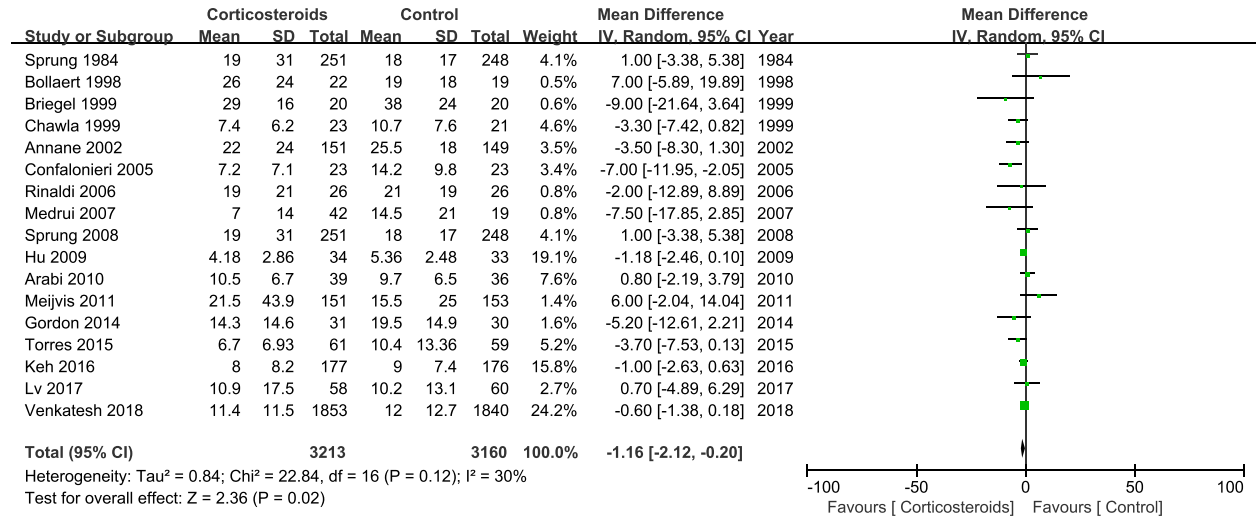

eFigure 18: Forest plot for shock reversal at day 7. df = degrees of freedom, M-H = Mantel-Haenszel.

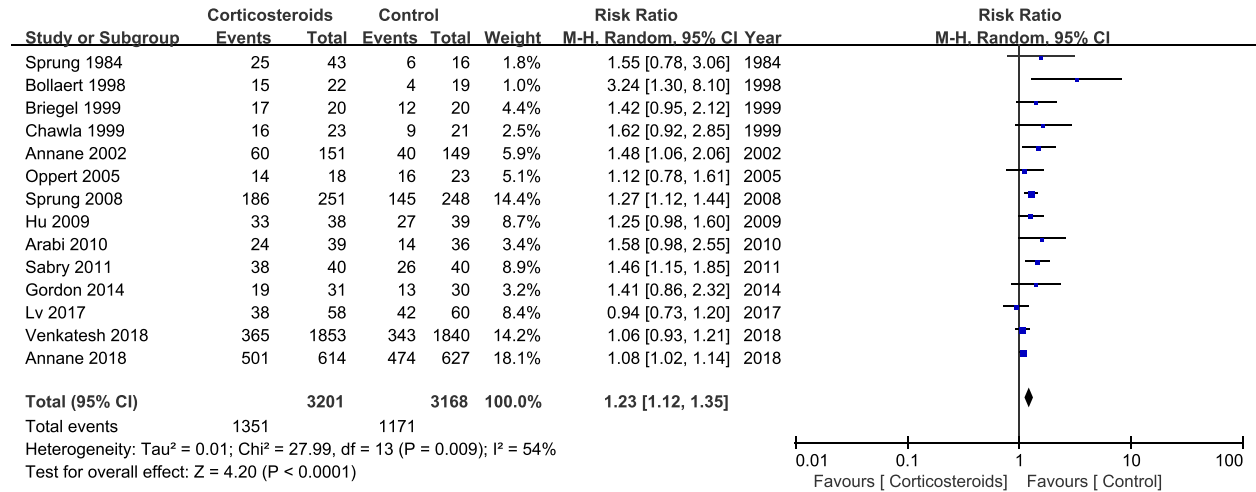

eFigure 19: Forest plot for SOFA score at day 7. df = degrees of freedom, M-H = Mantel-Haenszel.

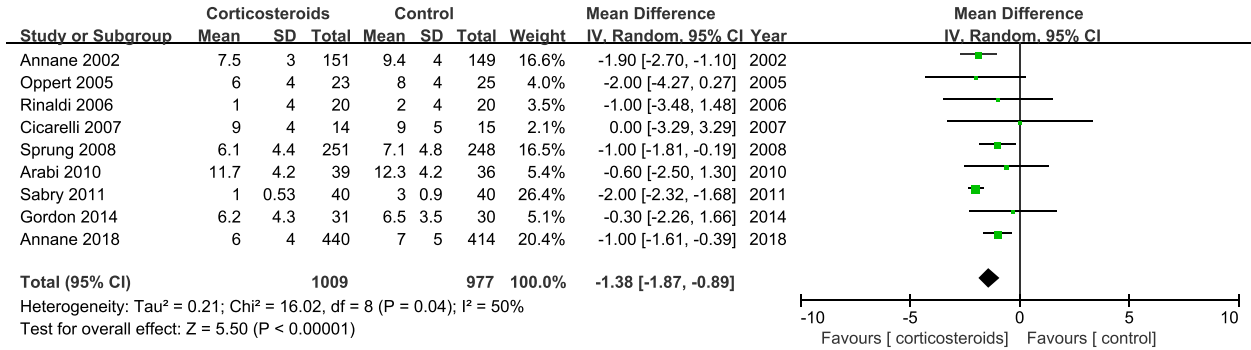



eFigure 20: Forest plot for time to resolution of shock. df = degrees of freedom, M-H = Mantel-Haenszel.

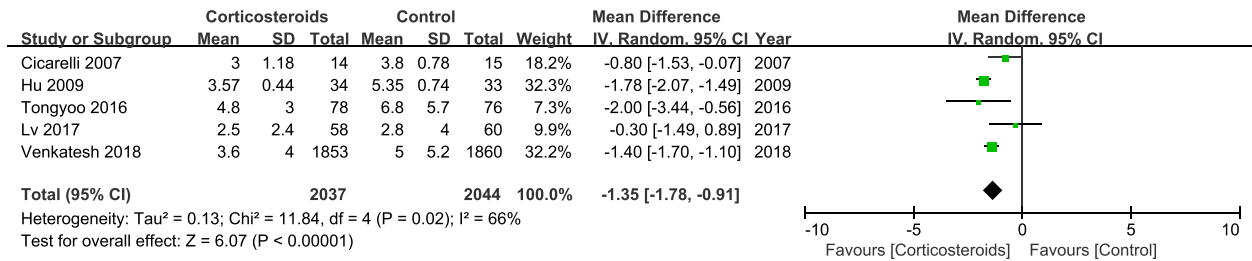

eFigure 21: Forest plot for vasopressor-free day to day 28. df = degrees of freedom, M-H = Mantel-Haenszel.

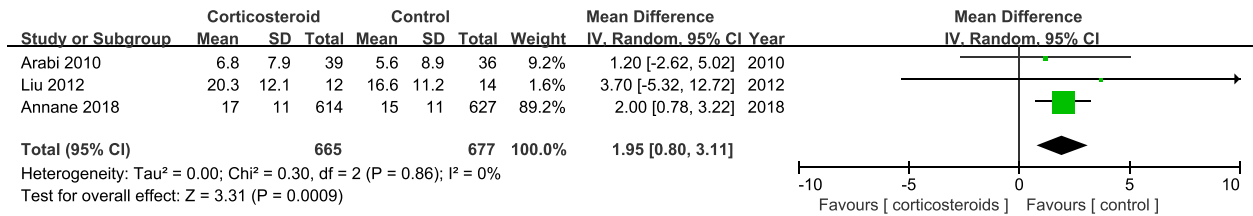

eFigure 22: Forest plot for ventilation-free day to day 28. df = degrees of freedom, M-H = Mantel-Haenszel.

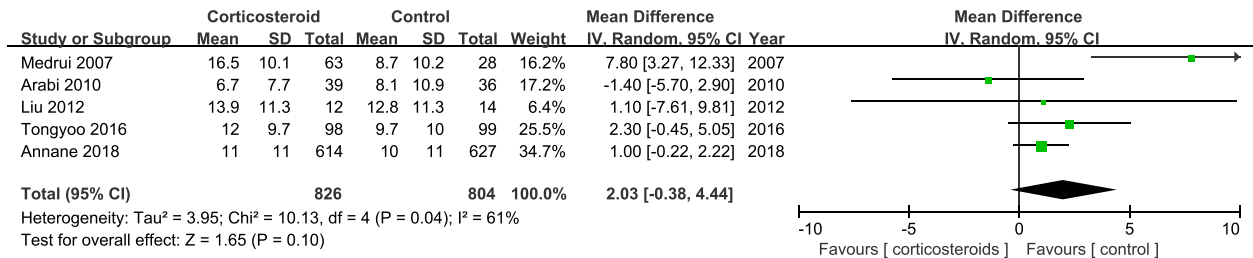

eFigure 23: Forest plot for any severe adverse event. df = degrees of freedom, M-H = Mantel-Haenszel.

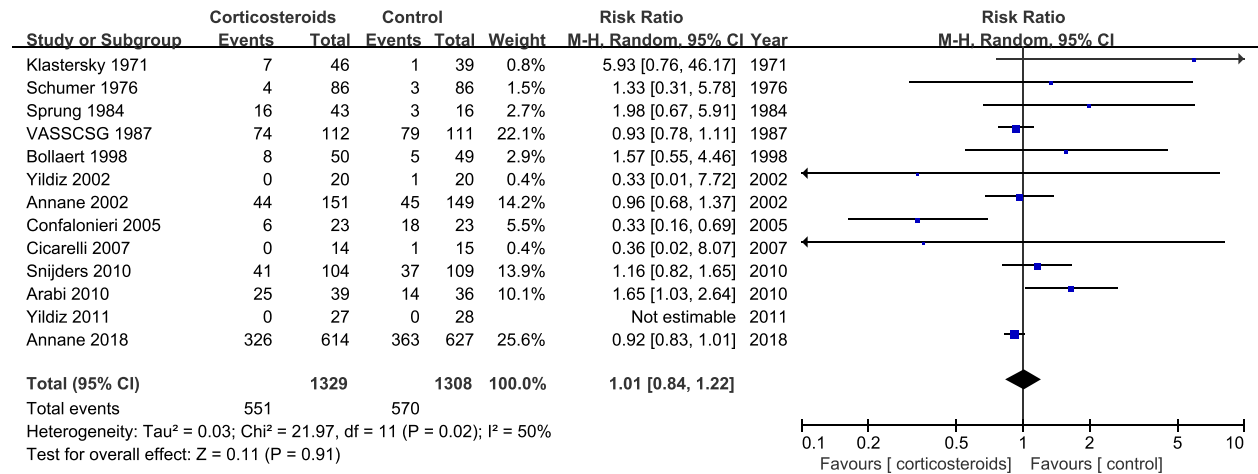

eFigure 24: Forest plot for gastroduodenal bleeding. df = degrees of freedom, M-H = Mantel-Haenszel.

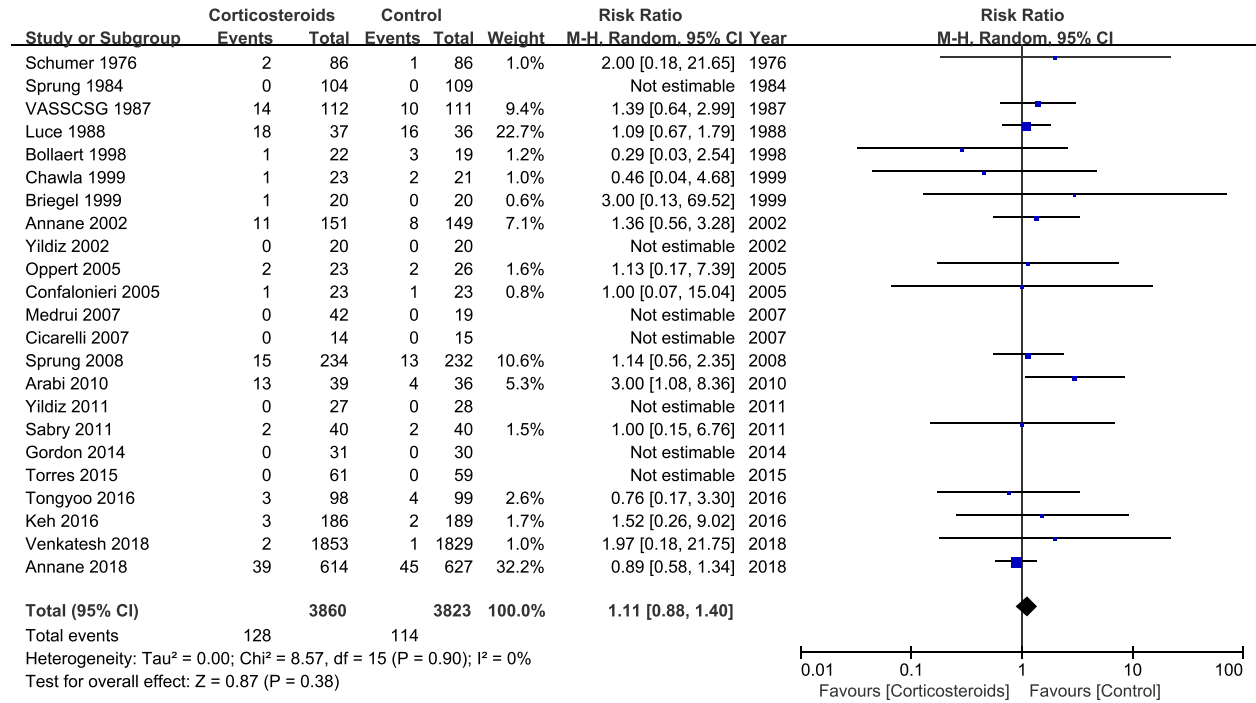

eFigure 25: Forest plot for superinfections. df = degrees of freedom, M-H = Mantel-Haenszel.

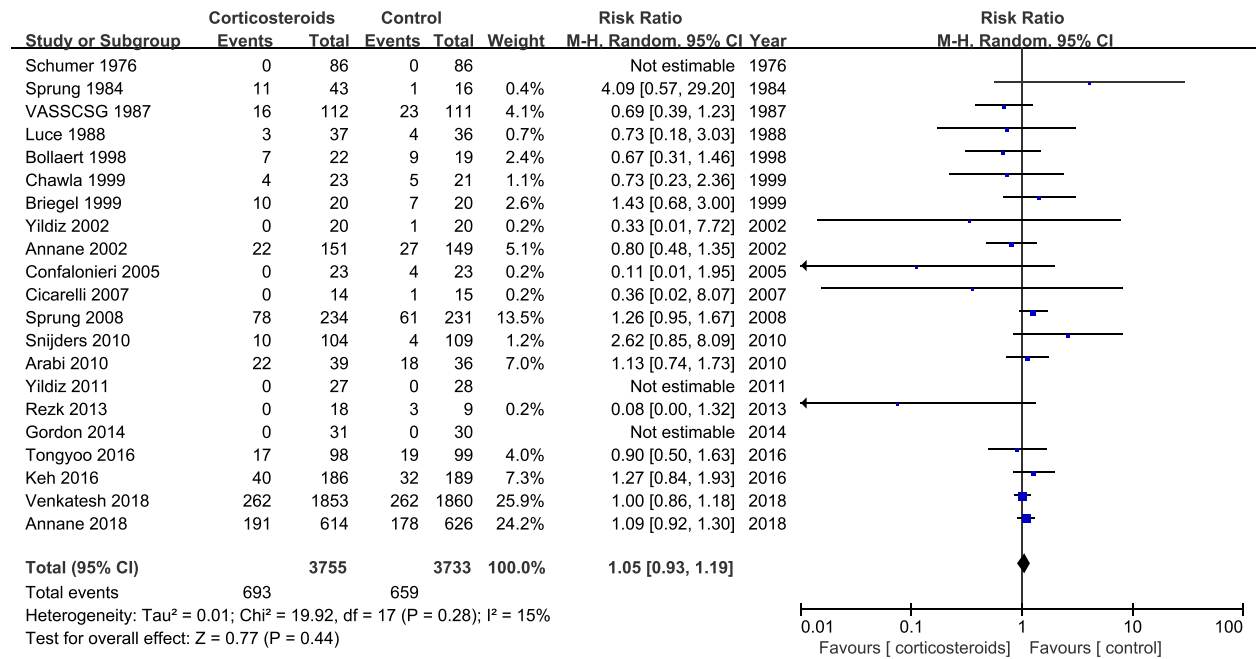

eFigure 26: Forest plot for hyperglycemia. df = degrees of freedom, M-H = Mantel-Haenszel.

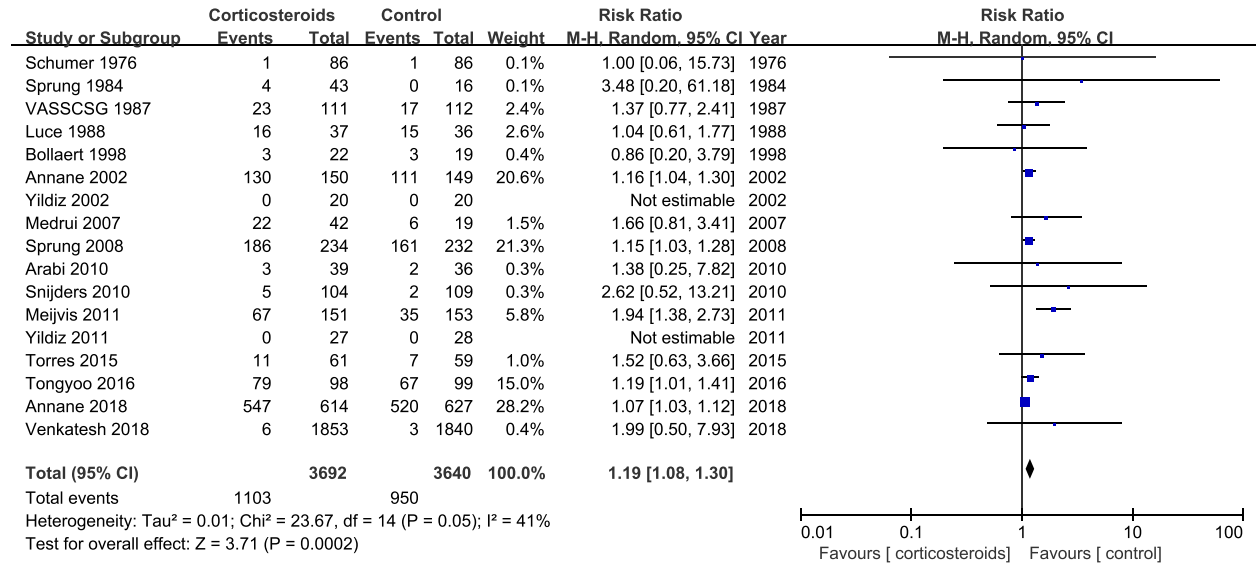

eFigure 27: Forest plot for hypernatremia. df = degrees of freedom, M-H = Mantel-Haenszel.

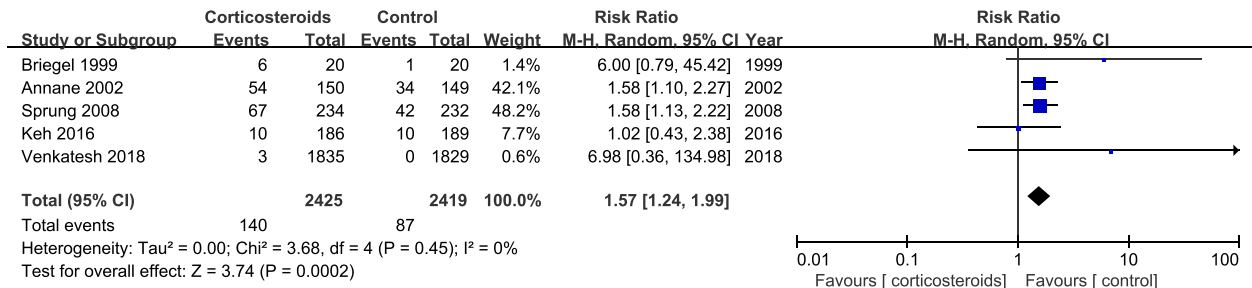

Supplement: jamainternmed-179-213-s001.pdf [file jamainternmed-179-213-s001.pdf]
